# 1 **Optogenetic perturbations of RNA expression in tissue space**

2 Ivano Legnini<sup>1</sup>, Lisa Emmenegger<sup>1</sup>, Ricardo Wurmus<sup>2</sup>, Alessandra Zappulo<sup>3</sup>, Anna Oliveras  
3 Martinez<sup>4</sup>, Cledi Cerda Jara<sup>1</sup>, Anastasiya Boltengagen<sup>1</sup>, Talé Hessler<sup>1</sup>, Guido Mastrobuoni<sup>5</sup>,  
4 Agnieszka Rybak-Wolf<sup>6</sup>, Stefan Kempa<sup>5</sup>, Robert Zinzen<sup>3</sup>, Andrew Woehler<sup>4</sup> and Nikolaus  
5 Rajewsky<sup>1</sup>

6

7 1. Laboratory for Systems Biology of Gene Regulatory Elements

8 2. Bioinformatics and Omics Data Science

9 3. Systems Biology of Neural Tissue Differentiation

10 4. Systems Biology Imaging

11 5. Proteomic and Metabolomics Platform

12 6. Organoid platform

13

14 Applies to all: Berlin Institute for Medical Systems Biology (BIMSB),

15 Max Delbrück Center for Molecular Medicine (MDC) in the Helmholtz Association,

16 Hannoversche Str. 28, 10115 Berlin

17

18 \*correspondence to [rajewsky@mdc-berlin.de](mailto:rajewsky@mdc-berlin.de)

19

## 20 **Keywords**

21 Spatial RNA perturbations, spatial transcriptomics, CRISPR/Cas13, CasRx, optogenetics,  
22 single cell, stem cells, organoids, Sonic Hedgehog (SHH)

23

24

25

26

27

28

1 **Abstract**

2 Quantifying gene expression in space, for example by spatial transcriptomics, is essential  
3 for describing the biology of cells and their interactions in complex tissues. Perturbation  
4 experiments, at single-cell resolution and conditional on both space and time, are necessary  
5 for dissecting the molecular mechanisms of these interactions. To this aim, we combined  
6 optogenetics and CRISPR technologies to activate or knock-down RNA of target genes, at  
7 single-cell resolution and in programmable spatial patterns. As a proof of principle, we  
8 optogenetically induced Sonic Hedgehog (SHH) signaling at a distinct spatial location within  
9 human neural organoids. This robustly induced known SHH spatial domains of gene  
10 expression – cell-autonomously and across the entire organoid. In principle, our approach  
11 can be used to induce or knock down RNAs from any gene of interest in specific spatial  
12 locations or patterns of complex biological systems.

## 1 Introduction

2 Within the last decade, novel technologies have enabled sequencing (e.g. Lee et al., 2014,  
3 Ståhl et al., 2016, Rodrigues et al., 2019) or imaging (e.g. Chen et al., 2015, Shah et al.,  
4 2016) thousands of transcripts *in situ*, thereby preserving the information of their spatial  
5 localization within complex tissues. These approaches may have a profound impact on the  
6 way we examine biological systems by allowing, for example, the detection of new types of  
7 histopathological signatures in tissue sections (Maniatis et al., 2019), or studying RNA  
8 compartmentalization in single cells (Xia et al., 2019). While quantifying and describing  
9 spatial RNA expression is helpful for understanding the organization of gene expression in  
10 complex tissues (e.g. Nitzan et al., 2019), the ability to perturb RNA expression in tissue  
11 space is fundamentally important to dissect the biological function of gene expression in  
12 processes and pathways that regulate cell-cell interactions, tissue architecture and  
13 homeostasis.

14 We addressed this problem by establishing an optogenetic system that enables inducible,  
15 targeted and localized RNA perturbation in a variety of biological systems. Several efforts  
16 have been made in this direction by combining light-responsive protein modules (Kennedy  
17 et al., 2010, Renicke et al., 2013, Kawano et al., 2015) with CRISPR/Cas9 (Nihongaki et al.,  
18 2015a, Zhou et al., 2017), to achieve irreversible genetic mutations. However, the readouts  
19 are difficult to interpret within a simple functional study due to mutational heterogeneity and  
20 limited efficacy. Another approach, light-inducible knock-downs, has only been achieved in  
21 cell lines, for example with photo-caged oligonucleotides/siRNAs (e.g. Mikat et al., 2007), or  
22 more recently with a genetically encoded optogenetic RNA interference (RNAi) system (Pils  
23 et al., 2020). While these methods are efficient and allow for precise temporal control in cell  
24 lines, their efficacy is unknown in more complex tissues and may be limited. For example,  
25 the RNAi approach used in Pils et al., is constitutively active in the dark and is inactivated  
26 by photo-stimulation, making it challenging to spatially control the knock-down of a given  
27 target in an organoid or *in vivo*. Furthermore, RNAi in general is known to suffer from off-  
28 target effects.

29 On the other hand, gene activation based on light-inducible transcription (Polstein et al.,  
30 2015, Nihongaki et al., 2015b, Nihongaki et al., 2017, De Santis et al., 2021) has been  
31 effectively used in cell culture and sometimes in organotypic culture and even *in vivo*  
32 (Yamada et al., 2018).

1 Therefore, to develop a flexible system that allows for both light-inducible transcription and  
2 knock-down of target genes with high resolution in space and time, we combined  
3 optogenetic transcription (Nihongaki et al., 2017, Yamada et al., 2018, De Santis et al.,  
4 2021) with the recently discovered CRISPR/Cas13 system (Abudayyeh et al., 2017, Cox et  
5 al., 2017, Konerman et al., 2018), which can be programmed to target and destroy RNA with  
6 high specificity. This combination was implemented by designing synthetic promoters to  
7 maximize transcriptional activity while minimizing leakage without light activation. We  
8 demonstrate that our combined approach enables effective (and reversible) overexpression  
9 (for example, up to ~800-fold for messages with low endogenous expression) and ~50-70%  
10 knock-down of reporter and endogenous transcripts in cultured cells and organoids, at  
11 single-cell resolution. We performed genome-wide mass-spec experiments which  
12 demonstrated the high specificity of these knock-downs.

13 To show that our approach can indeed perturb biological function of gene expression, we  
14 chose to target Sonic Hedgehog (SHH) signaling. SHH is a well-studied morphogen that is  
15 central to a variety of biological processes, including dorsoventral patterning of the  
16 developing neural tube in vertebrates (Ribes and Briscoe, 2009). SHH synthesis was  
17 effectively “printed” onto a cellular layer by light induction, stimulating localized expression  
18 of target genes as observed by immunostainings and spatial transcriptomics. We developed  
19 neural organoids to mimic aspects of the neural tube and we optogenetically induced SHH  
20 in a pole of these organoids, which was sufficient to robustly establish spatial domains of  
21 gene expression – cell-autonomously and across the entire organoid. This setup might  
22 prove immensely useful for studying the properties of SHH signaling and other signaling  
23 molecules *in vitro*, as well as to engineer 3D cellular models with complex spatial patterning  
24 modalities.

25 Having shown that our approach is specific, can be induced at single-cell resolution, and  
26 perturbs biological function of gene expression, we sought to design a system to deliver light  
27 activation to single cells simultaneously, at programmable, multiple locations within a  
28 complex tissue or organoid. Therefore, we constructed a Digital Micromirror Device (DMD)  
29 microscope combined with a cell culture chamber for live-cell stimulation. Programming is  
30 made easy through a micromanager/ImageJ-based graphical user interface (GUI). We show  
31 that this system allows to “print” complex patterns of gene expression.

1 In principle, our approach can be used to induce or knock down RNAs from any gene of  
2 interest in specific spatial locations or patterns of complex biological systems. We also  
3 present a careful discussion of its potential and limitations.

4

## 5 **Results**

6 In order to perturb RNA expression with spatial resolution, we adopted, optimized and  
7 constructed a variety of tools based on the combination of optogenetic modules, to allow  
8 spatial control with photo-stimulation (pMag/nMag and CRY/CIB), and gene perturbation  
9 modules, to allow gene activations (CRISPR/Cas9, TetON and Cre/Lox systems) and  
10 knock-downs (CRISPR/Cas13). Initial attempts at rendering Cas13 proteins light-responsive  
11 were not successful (however, we report several functional split sites for Cas13b, as well as  
12 functional Cas13b fusions with RNA silencing domains from GW182 proteins and other  
13 constructs with distinct and intriguing properties in a supplementary note and in Figures S1-  
14 2). Instead, a different strategy where we designed synthetic promoters to couple light-  
15 inducible gene transcription to CasRx transcription was successful.

16

### 17 Light-inducible gene activation combined with CasRx transcription for optogenetic RNA 18 targeting.

19 To perform light-inducible gene activations, we utilized the split CRISPR-Cas9-based  
20 Photoactivatable Transcription System (*split CPTS2.0*, hereafter referred to as *SCPTS*,  
21 Nihongaki et al., 2017), which consists of an enzymatically dead Cas9 (dCas9) that has  
22 been split into N- and C-terminal domains, and fused to the photoinducible dimerization  
23 moieties pMag and nMag. Blue light triggers pMag-nMag dimerization, thus reconstituting  
24 dCas9, which then binds at the targeted promoter according to the loaded guide RNA  
25 (sgRNA). This SCPTS system activates transcription in the vicinity (CRISPRa) through a  
26 VP64 activation domain fused to the C-terminal Cas9 fragment and p65 and HSF1 domains  
27 fused to an MCP moiety that associates with the MS2-stem-loops engineered into the  
28 sgRNA (Fig. 1a). This system has been shown to be a potent transcriptional activator under  
29 blue light illumination (Nihongaki et al., 2017).

30 We combined an SCPTS module with a CRISPR/CasRx module (Fig. 1a-b), such that  
31 photo-stimulation controls CasRx synthesis to induce targeted RNA knock-downs. For

1 programming the SCPTS system to stimulate CasRx synthesis upon photo-stimulation, we  
2 first optimized the system in the context of HEK cells transfection. To do so, we designed a  
3 custom programmable LED board (Methods), which accommodates a 96-well cell culture  
4 plates and can be used in a cell culture incubator. Levels of induction of transcription were  
5 comparable to Nihongaki et al. (2017, Fig. S2a). We then tested a promoter/sgRNA pair,  
6 previously used in a similar context (Gal4/UAS, Nihongaki et al, 2015b), and additionally  
7 designed two synthetic promoters (CRISPRa Synthetic Promoter – CaSP1 and 2, partially  
8 based on Loew et al., 2010, Fig. 1b) to drive CasRx transcription. We transfected HEK cells  
9 with the plasmids encoding the transcription system, the sgRNA and a CasRx-T2A-GFP  
10 cassette under the control of one of the three promoters, and imaged GFP over time upon  
11 photo-stimulation (Fig. 1c, S2b). Both synthetic promoters CaSP1 and CaSP2 are more  
12 active than the UAS promoter (Fig. 1d). CaSP1 induced a ~45-fold-change activation after  
13 50h illumination over the non-targeting guide control, with ~16% leakage in the dark. In  
14 contrast, CaSP2 elicited a ~21-fold induction, with a leakage of ~9% in the dark. To control  
15 for unspecific effects of light stimulation, we used a constitutive CasRx-T2A-GFP cassette  
16 under a strong EF1a promoter, observing an increase of GFP over 24h of illumination, with  
17 no substantial difference between light and dark conditions (Fig. S2c). Representative  
18 images of the SCPTS/Cas13 photo-stimulation are shown in Fig. 1e. Two more systems,  
19 based on a light-inducible TetON transcription system (PA-TetON, Yamada et al., 2018) and  
20 a light-inducible Cre/Lox recombination system (PA-Cre/Lox, De Santis et al., 2021) are  
21 described in a supplementary note and in Figure S2d-e. Finally, we confirmed the  
22 microscopy-based GFP quantifications for all CasRx expression systems with flow  
23 cytometry (Fig. S2f-i).

#### 24 25 Light-inducible knock-down of reporter and endogenous transcripts.

26 We next tested the efficacy of constitutively expressed or light-inducible CasRx in knocking  
27 down reporter and endogenous transcripts (Fig. 2a). We constructed a Tet-ON RFP reporter  
28 and assessed its knock-down with a constitutively expressed CasRx. CasRx was able to  
29 efficiently target RFP with a single guide RNA (PS18 adopted from Abudayyeh et al., 2016  
30 for practical reasons; hereafter referred to as “RFP guide RNA”; Fig. 2b). However, GFP  
31 (which tags the CasRx cassette) was also strongly depleted for reasons that we do not fully  
32 understand (Fig. S3a). We investigated this effect further and report the results in the

1 supplementary note and Fig. S3b-c. To rule out the occurrence of global off-targeting effects,  
2 we performed genome-wide mass-spectrometry-based quantitative proteomics. The only  
3 proteins with a statistically significant fold change larger than 2 when comparing cells  
4 transfected with a non-targeting guide (NT) vs. an RFP-targeting guide were RFP, CasRx  
5 and GFP (Fig. 2c). We also sequenced total RNA and found only six differentially expressed  
6 transcripts: four were highly homologous to 18S ribosomal RNA, which are typical artifacts  
7 of the ribodepletion, and the remaining two were RFP and CasRx-GFP, with only RFP  
8 having a fold-change larger than 2 (Fig. S3d). In summary, genome-wide protein and RNA  
9 quantification both demonstrated high specificity of our knock-down approach.

10 Given the targeting efficacy and specificity of the constitutive CasRx, we tested whether a  
11 light-induced CasRx is also capable of specifically knocking down RFP. We transfected HEK  
12 cells with the SCPTS CasRx systems together with either a non-targeting or an RFP-  
13 targeting guide and observed RFP knock-down efficiencies of 40-60% in the lit state, with  
14 residual activity of 10-30% in the dark state, depending on the construct (Fig. 2d). As before,  
15 GFP was unexpectedly depleted when CasRx was programmed to target RFP (Fig. S3e).  
16 We then tested the CaSP2-CasRx system, which provides a good trade-off between  
17 targeting efficacy and leakage, on endogenous targets. We designed two guide RNAs  
18 complementary to the circular RNA CDR1as and adopted a previously published sequence  
19 for the STAT3 mRNA (Konerman et al., 2018) and validated them with a constitutive CasRx  
20 (Fig. S3f). We transfected one CDR1as guide and the STAT3 guide together with the  
21 SCPTS-CaSP2-CasRx system, stimulated the cells with blue light for 24-36 hours and  
22 performed qRT-PCR for target quantification. As shown in Fig. 2e, we achieved ~71% and  
23 ~45% knock-down for CDR1as and STAT3 respectively, with ~24% and ~11% leakage.

24

### 25 Spatial gene perturbations.

26 In order to leverage the potential of optogenetic RNA perturbations, we not only need  
27 programmable activations and knock-downs, but also the means to program spatial  
28 stimulations. To this end, we tested three different approaches (Fig. 3a).

29 First, we applied a laser-printed photomask between the light source and cells that express  
30 light-inducible CasRx cassettes (Fig. 3b and S4a). This setup is simple to set up, as a laser  
31 printer is sufficient to engrave the desired pattern on a plastic sheet, which is then attached  
32 below a cell culture plate. The plate is then placed on top of a LED array and light stimulation

1 is provided for the desired time (e.g. 6-50h, as in Fig. S1, 1 and 2). The array is capable of  
2 generating complex patterns of activation with a resolution on the order of hundreds of  
3 micrometers, provided by the photomask (Fig. 3b). We noticed that the induction diffuses  
4 over the edges of the photomask, possibly due to reflection and refraction within the wells.

5 Next, we tested if precise spatial activation of CasRx can be achieved at single-cell  
6 resolution. To this aim, we employed a laser scanning-based photo-stimulation approach,  
7 and we performed live-cell imaging with a laser scanning confocal microscope. We induced  
8 CasRx expression from the light inducible Cre/Lox system by scanning a region of interest  
9 (ROI) containing a single-cell. Using this approach, we successfully stimulated a single cell  
10 in a field of view (FOV) containing several cells. (Fig. 3c).

11 Lastly, we constructed a Digital Micromirror Device (DMD) microscope, combined with a cell  
12 culture chamber for live-cell stimulation and imaging, that allows to program spatial  
13 activation patterns by a simple micromanager/ImageJ-based graphical user interface (GUI).  
14 We describe the details for building and programming this “point-and-shoot” setup in the  
15 methods section. Within the GUI, we can draw ROIs in any shape and number, which will  
16 then be illuminated by turning on the associated micromirrors. With this setup, we can  
17 program complex patterns of spatial stimulation, for example multiple and different ROIs at  
18 once (Fig. 3d).

19

## 20 Optogenetic stimulation of the SHH pathway in hiPSCs.

21 To test the ability of our setup to perturb biologically relevant processes, we focused on the  
22 induction of Sonic Hedgehog in hiPSCs (Fig. 4a). We first designed three sgRNAs for  
23 activating the *SHH* promoter with the SCPTS system (Fig. S5a). We transfected HEK293T  
24 cells with all the SCPTS modules and each sgRNA, then quantified *SHH* mRNA expression  
25 after 24 hours of photo-stimulation. Guide 1 was the most efficient, increasing *SHH* mRNA  
26 expression ca. 800-fold over a non-targeting guide (Fig. S5b). In addition, we designed  
27 guides for another morphogen involved in neurodevelopment, *BMP4* (Fig. S5c). Guide 3  
28 was the most effective, inducing a 4-fold increase in *BMP4* mRNA levels (Fig. S5d). Leakage  
29 was approximately 5% for *SHH* guide 1 and 30% for *BMP4* guide 3. We note that *BMP4*  
30 was already expressed in HEK cells, which is likely a reason for the lower induction and  
31 higher leakage. We assessed whether the induced SHH exerted its biological activity by  
32 stimulating the expression of its targets, upon transfection of the SCPTS system in hiPSCs.



1 We measured *FOXA2*, *FOXG1*, *NKX2-1*, *NKX6-2* and *OLIG2* expression after 24, 48 and  
2 72 hours of stimulation. *SHH* reached its highest level of activation at 24 hours and  
3 decreased at 48 and 72 hours (Fig. S5e-f). *FOXA2*, *NKX6-2* and *OLIG2* were significantly  
4 upregulated upon light stimulation in neural induction media, but not in stem cell media (Fig.  
5 S5e-f). Light-inducible activation of the *SHH* promoter is therefore sufficient to stimulate *SHH*  
6 transcription and exert a detectable biological effect by inducing the expression of some of  
7 its known targets. In parallel, we used the PA-Cre/Lox system to generate a stable hiPSC  
8 line that can overexpress a NeonGreen-SHH cassette upon light stimulation and  
9 doxycycline treatment (SHH-GFP for simplicity, De Santis et al., bioRxiv 2021, suppl. video  
10 1). With this system, we observed stronger *SHH* mRNA induction upon light stimulation, but  
11 also higher leakage; the same was true for its targets (Fig. S4e-g). Robust expression of  
12 *FOXA2* was visible at the protein level after inducing SHH for 6-7 days in restricted groups  
13 of cells with the DMD setup (Fig. 4b).

14 To systematically profile spatial gene expression upon spatial gene perturbations, we  
15 established a method to transfer cultured cells on a spatial transcriptomic slide (10X Visium).  
16 We adapted hiPSC culture and photo-stimulation to cell culture inserts, which consist of a  
17 PET membrane held by a plastic scaffold within a cell culture dish. The membrane can be  
18 cut from the scaffold, transferred onto a slide and removed after cell fixation (Fig. 4a,c and  
19 S5h). We used this system to probe the gene expression response to the induction of *SHH*  
20 in the center of the membrane for a time course of 120 hours, with the PA-Cre/Lox system.  
21 Since the RNA capture was not homogeneous, yielding vastly different UMI counts across  
22 the capture area (Fig. S4i), we merged the transcript counts for a set of concentric circles,  
23 with the inner circle enclosing the induced area and the outer ones placed at increasing  
24 distances (Fig. 4d). We examined a gene set comprising *SHH* and its targets, and retrieved  
25 a peak of expression in the inner part of the membrane for all time points after induction, as  
26 compared to randomized controls (Fig. 4e and S5j-l). We note that the raw transcript counts  
27 for these transcripts was low (globally, in the range of tens or hundreds), and dominated by  
28 *SHH* at the shortest time-point. Looking at other genes involved in the SHH pathway, we  
29 found that the receptor *PTCH1* was strongly upregulated in the proximity of the SHH signal  
30 at 120h, as, to a lesser extent, its interaction partner *SMO* (Fig. S5l).

31

32 Optogenetic patterning of neural organoids.

1 *SHH* induction produced a biological response in hiPSCs only detectable with sensitive  
2 techniques in short time frames (by qRT-PCR and to a lesser extent by spatial  
3 transcriptomics), and becoming more robust over time with the FOXA2 protein becoming  
4 detectable 6-7 days after the stimulation. To overcome the constraint of a 2D system which  
5 has limited endurance in culture and poor physiological resemblance to a developing tissue,  
6 we devised a protocol for producing 3D neural organoids, partially based on previous  
7 attempts at mimicking the dorsal-ventral patterning of the caudal part of the neural tube *in*  
8 *vitro* (Zheng et al., 2019). We used laser scanning to induce *SHH* expression in a pole of  
9 embryoid bodies grown for 4 days (Fig. 4f and suppl. video 2), then supplemented the  
10 medium with retinoic acid for 5 days and allowed them to grow and differentiate for an  
11 additional 7 days (Fig. S5n). We tracked NeonGreen fluorescence to assess spread and  
12 location of SHH expressing-cells in whole-mount fixed organoids, and noticed that some of  
13 them spread out from the induced pole, likely due to cell divisions and migration.  
14 Nevertheless, overall the organoids retained a polarized SHH pattern, which induced a  
15 robust and spatially restricted expression of FOXA2, whereas non-induced organoids  
16 produced neither detectable NeonGreen nor FOXA2 (Fig. S4o). We stained adjacent  
17 organoid slices for SHH targets known to be induced in different neural tube domains at  
18 increasing distance from the SHH source (Ribes and Briscoe, 2009) and observed that  
19 FOXA2 and OLIG2 established, as they should, mutually exclusive expression domains,  
20 with FOXA2 being activated in the proximity of SHH-producing cells and OLIG2 further away  
21 (Fig. 4g). NKX6-1 expression instead encompassed both FOXA2 and OLIG2 domains, but  
22 was restricted to cells located at the exterior of neuroepithelial loops (Fig. 4g). We conclude  
23 that optogenetic patterning of neural organoids through localized SHH induction allows to  
24 establish spatially restricted patterns of RNA expression, marked by transcription factors  
25 known to specify distinct populations of progenitor cells *in vivo*.

26

## 27 **Discussion**

28 The pursuit of imaging RNA/protein expression in tissues dates back to decades ago. *In situ*  
29 hybridization and immunostainings have been instrumental to understand the complex  
30 interplay of cells in tissues in health, disease and development. In the past few years, spatial  
31 investigation of RNA expression has made huge advances, with new technologies becoming  
32 available for high-throughput spatial transcriptomic profiling (see Moses and Pachter, 2021

1 for a tour of the *museum of spatial transcriptomics*). We believe that one of the next frontiers  
2 is to marry high-throughput spatial transcriptomics with precise and spatially resolved  
3 functional perturbations. To this aim, we developed an experimental setup which allows the  
4 following: 1) choose a gene or a gene set of interest, 2) perturb it (by RNA knock-down,  
5 activation, or both) in a specific area of interest of a 2D or 3D cellular model and 3) measure  
6 the impact of the perturbation in the transcriptomic and physical space. With this work, we  
7 both provide a general blueprint as well as tools for performing these experiments. All tools  
8 are made freely available.

9 We first implemented and optimized available tools for optogenetic gene activation, and at  
10 the same time devised molecular tools to perform RNA knock-downs at single-cell  
11 resolution. We therefore combined optogenetics, to provide spatial control, with  
12 CRISPR/Cas13, to perform programmable knock-downs. To do so, we used a CRISPRa-  
13 based transcription system (Nihongaki et al., 2017), in addition to a Tet-ON transcription  
14 system (Yamada et al., 2018), and a Cre/Lox system (De Santis et al., bioRxiv 2021), which  
15 are more extensively described in the supplement. We combined these with different CasRx  
16 expression cassettes and found that they could induce CasRx synthesis upon photo-  
17 stimulation, with a tradeoff between expression level and background. For example, the  
18 CRISPRa system combined with our CaSP1 promoter was very effective upon light  
19 stimulation, but it also had high background. CaSP2 had lower efficiency, but also lower  
20 leakage. This is common for inducible systems, and one has to adjust the experimental  
21 conditions to reach a predetermined goal. In this case, one can titrate the minimum amount  
22 of CasRx required for efficient knock-down of a given target, and then adjust the  
23 experimental setup to have the lit state exceeding that threshold. These systems enabled  
24 silencing of reporter and endogenous targets with varying efficiencies and leakage. Further  
25 improvements may be possible, for example by using guide RNA arrays instead of single  
26 guides (Koneremann et al., 2018).

27 To imprint gene expression patterns on a cellular “canvas”, we tested different means for  
28 spatial stimulations, including photomasks, laser scanning and digital light projection. While  
29 fast and comparatively easy, using a photomask in between a light source (e.g. a LED array)  
30 and the specimen lacks in resolution and accuracy. To overcome these limitations, we used  
31 a laser scanning setup that provides enough resolution, precision and minimum background  
32 noise to stimulate a single cell. A key limitation of the scanning-based system is that only a

1 single volume of a predefined shape can be stimulated at a time (while, with more  
2 sophisticated setups, multiple or complex patterns could be stimulated sequentially). A  
3 promising and extremely versatile alternative is to employ a DMD setup, which uses a  
4 programmable array of micro-mirrors (as for example in Yamada et al., 2018), to  
5 simultaneously illuminate multiple and complex ROIs. We constructed such a setup with a  
6 commercial digital light processing projector and showed that we can project complex  
7 stimulation patterns on cells, inducing CasRx expression in defined ROIs which can be  
8 drawn in a convenient GUI.

9 Spatial perturbations of RNA may be extremely useful in studying numerous biological  
10 processes. For example, overexpression of oncogenes or knock-down of tumor suppressors  
11 in a single cell or in defined cell types within organoids may be used as a novel model for  
12 tumorigenesis, by examining proliferation and migration of the perturbed cells in the tissue  
13 with extreme spatiotemporal control. Another interesting application is the study of  
14 developmental processes involving cell-cell interactions. For example, inducing or knocking  
15 down signaling molecules or receptors can help understanding the principles and kinetics of  
16 cellular interactions in a simplified setup, where the position of sender or receiver cells can  
17 be programmed by photo-stimulation (e.g. Rogers et al., 2020). As a paradigm of this sort  
18 of application, we focused on the Sonic Hedgehog pathway. SHH is a well-known  
19 morphogen produced during vertebrate development by the notochord and the floor plate of  
20 the neural tube. It is released in the extracellular space, where it forms a gradient along the  
21 ventral-dorsal axis, which specifies the fate of progenitor cells located at increasing  
22 distances from the source of the signal. To imitate this process *in vitro*, we locally induced  
23 SHH in an “artificial organizer” and measured its effect on gene expression over time. There  
24 have been several studies on SHH signaling *in vitro*, by means of treatment with a  
25 recombinant protein (Kutejova et al., 2016), its overexpression (Li et al., 2018) or fusing a  
26 SHH-expressing spheroid with organoids (Cederquist et al., 2019). Very recently, De Santis  
27 et al. (bioRxiv, 2021) used a light-inducible Cre/Lox system to overexpress SHH in human  
28 induced pluripotent stem cells and showed that this approach can induce a strong cell-  
29 autonomous and non-autonomous response. We adopted the same system, as well as a  
30 CRISPRa-based system to activate the endogenous SHH locus, and combined it with spatial  
31 transcriptomics, by establishing a protocol for transferring a cell monolayer to a glass slide  
32 suitable for analysis by Visium (10X). We could observe an induction of the pathway in this  
33 setup, but with limited resolution and sensitivity. We therefore established a protocol for

1 producing human neural organoids, which we expected to reflect more closely the  
2 physiological properties of a developing tissue. We optogenetically induced SHH in a  
3 restricted group of cells within these organoids. This was sufficient to robustly induce classic  
4 patterns of SHH signaling across the entire organoids. We believe that this setup might  
5 prove extremely useful for studying spatio-temporal properties of SHH signaling or other  
6 signaling pathways, as well as for generating new organoid models with complex and  
7 controlled spatial patterns of gene expression.

8 In summary, implementing our approach to perturb RNA expression in tissue space is  
9 practicable within a few weeks in cell lines and organoids in a simplified and general setup,  
10 which includes: a) designing and cloning guide RNAs or expression cassettes within the  
11 available plasmids (Table S2, soon in Addgene), b) transfecting cells for transient  
12 perturbations or generating stable lines for long-term experiments / organoid generation, c)  
13 activating the perturbations with one of the proposed photostimulation setups, for which  
14 detailed construction, programming and usage procedures are provided in the Methods.

15

## 1 **Acknowledgements**

2 We thank Gwendolin Matz and Ruth Alcaraz Pareja for help with cloning and cell culture,  
3 Margareta Herzog and Alex Tschernycheff for administration, Salah Ayoub for RNA-  
4 sequencing experiments, Sebastian Ehrig for helping with photomasks printing and for  
5 casting the PDMS supports for organoids induction, Jonathan Froehlich, Giuseppe Macino,  
6 Andreas Möglich and Peter Hegemann for useful discussions, Anna Löwa (BIMSB Organoid  
7 platform), Sebastian Diecke and Ralph Kuhn (fMDC stem cell core facility) for advice on  
8 hiPSC culture and transfections, Omar Abudayyeh, Jonathan Gootenberg and Feng Zhang  
9 for sharing plasmids and advice regarding Cas13b, Riccardo De Santis for sharing the  
10 Cre/Lox plasmids and advice regarding the Cre experiments, Yuta Nihongaki for advice  
11 regarding CPTS/split-CPTS optimization, Itaru Imayoshi and Mayumi Yamada for sharing  
12 the PA-TetON plasmids, Heiko Lickert for sharing the XM001 hiPSC line, the whole N.  
13 Rajewsky lab for discussions, support and constructive feedback, particularly David  
14 Koppstein for reading the manuscript, Tatiana Borodina, Caroline Braeuning, Thomas  
15 Conrad, Daniele Yumi Sunaga-Franze, Kerim Secener, Jeannine Wilde (BIMSB sequencing  
16 facility) for sequencing, Visium and FACS experiments. All illustrations were created with  
17 BioRender.com.

18

## 19 **Funding**

20 IL was a recipient of an EMBO Long Term Fellowship when this work was started (ALTF  
21 1235-2016). Third party funding came from the Deutsche Forschungsgemeinschaft (DFG  
22 #RA838/5-1), Berlin Institute of Health (BIH #CRG2aTP7), Deutsches Zentrum für Herz-  
23 Kreislauf-Forschung (DZHK #81X2100155).

24

## 25 **Author contributions**

26 NR and IL conceived the original idea. NR supervised the whole project, giving input about  
27 experiments and analyses. IL wrote the first manuscript draft with input and feedback from  
28 all authors, NR revised and finalized the manuscript. IL designed and supervised all  
29 experiments with input from NR, performed all Cas13 experiments in HEK cells, cloned most  
30 of the plasmids, performed RNA extractions and qPCRs, performed most of the inductions  
31 with the LED board, the confocal and the DMD setups, analyzed qPCR, imaging, RNA-seq

1 and Visium data. LE performed all experiments in hiPSCs, RNA extractions, qPCRs,  
2 immunostainings and optimized the Visium protocol from 2D culture. AB optimized the  
3 Visium protocol for 2D culture with LE and produced all Visium libraries. CCJ optimized and  
4 performed live cell imaging of GFP and RFP in HEK cells. TH generated the PA-Cre/Lox  
5 HEK cell lines, cloned some of the plasmids, performed RNA extractions and qPCRs and  
6 assisted LE with immunostainings. GM performed the proteomics experiment and analyses,  
7 under the supervision of SK. AOM optimized and performed CasRx inductions with the  
8 confocal microscope setup with IL. ARW supervised the work done with hiPSCs and  
9 performed cell and organoid culture. AW constructed the DMD setup, wrote the code for  
10 controlling spatial stimulations and optimized CasRx and SHH inductions with this setup.  
11 RW contributed at the initial stage of the project designing, producing and programming the  
12 LED board for whole-well stimulations and assisting IL with the first induction experiments.  
13 AZ developed the protocol for generating neural organoids, performed SHH inductions with  
14 IL, immunostainings and imaging under the supervision of RZ.

15

## 16 **Methods**

### 17 Cell culture, transfections and cell lines generation.

18 HEK293T cells were cultured in DMEM (high-glucose, with glutamax and pyruvate, Thermo  
19 Fischer #11360872) supplemented with 10% Tet-free FBS (PAN biotech., #P30-3602) in  
20 absence of antibiotics at 37°C with 5% CO<sub>2</sub>. They were split every 2/3 days with 0.05%  
21 trypsin in 10 cm cell culture dishes. For transfection experiments shown in figure 1, 30,000  
22 cells were seeded the evening before transfection in 70 µl medium on white 96-well, clear-  
23 bottom plates (Corning #3610). The morning after, a mix comprised of 12 µl Optimem  
24 (Thermo Fisher, #31985062), 25 ng Luciferase-encoding plasmid, 150 ng guide RNA-  
25 encoding plasmid and 150 ng Cas13-encoding plasmid or 2 times 100 ng of each Split-  
26 Cas13-encoding plasmid was mixed with 25 µl Optimem and 0.5 µl Lipofectamine 2000  
27 (Thermo Fisher #11668019), incubated at room temperature for 10 minutes and then  
28 pipetted onto the cells. Light stimulation was started 6 hours post-transfection and luciferase  
29 assay was performed in the same plate 24 hours post-induction by removing 50 µl medium,  
30 adding 75 µl Luciferase assay buffer (Promega Dual-Luciferase Reporter Assay System,  
31 #E1910), incubating 10 minutes at room temperature, then reading Firefly luciferase, then  
32 75 µl Stop&Glo buffer, incubating 10 minutes at room temperature, then reading Renilla

1 luciferase. Plate readings were performed in a Tecan M200 infinite Pro plate reader with  
2 two-seconds integration for luciferase measurement.

3 For transfection experiments shown in figures S1, 1, 2 and 3, 25,000 cells were seeded the  
4 evening before transfection in 70  $\mu$ l medium on black 96-well, clear-bottom plates (Corning  
5 #3904). The morning after, a transfection mix comprised of 25  $\mu$ l Optimem, 0.4  $\mu$ l P3000  
6 and 100-300 ng plasmid DNA was pooled with 25  $\mu$ l Optimem and 0.3  $\mu$ l Lipofectamine  
7 3000 (Thermo Fisher #L3000001), incubated for 10 minutes at room temperature and then  
8 pipetted onto the cells. Light stimulation was started 6 hours post-transfection and live-cell  
9 imaging was performed at 24 hours post-induction unless differently indicated (e.g. for the  
10 time-course in figure 1).

11 Transfections for the RNA-seq and proteomics experiments shown in figure 2 were  
12 performed in 6-well plates with 1 million HEK293T cells per well. The morning after seeding,  
13 a mix comprised of 250  $\mu$ l Optimem, 800 ng ePB Puro TT RFP plasmid, 1000 ng guide RNA-  
14 encoding plasmid and 1000 ng Cas13-encoding plasmid, 8  $\mu$ l p3000 reagent and 2  $\mu$ l  
15 doxycycline (1mg/ml) was mixed with 250  $\mu$ l Optimem and 6  $\mu$ l Lipofectamine 3000,  
16 incubated at room temperature for 10 minutes and then pipetted onto the cells. Cells were  
17 harvested 36h post-transfection for RNA extraction with home-made trizol or for protein  
18 purification, as described later in the RNA-seq and proteomics sections.

19 Transfections for generating the Cre/Lox CasRx line were performed in 12-well plates  
20 seeded with 100,000 HEK293T cells and the day after transfected with 250 ng ePB-PA-Cre  
21 plasmid, 500 ng LoxP-CasRx plasmid, 125 ng hyperactive transposase plasmid, 100  $\mu$ l  
22 Optimem and 2.5  $\mu$ l p3000 reagent, mixed with 100  $\mu$ l Optimem and 1.5  $\mu$ l Lipofectamine  
23 3000 reagent, incubated for 10 min at RT and then pipetted onto the cells. After 3 days post-  
24 tranfection, cells were split into two wells of a new 6-well plate and selected with puromycin  
25 (1 $\mu$ g/ml) and blasticidin (5  $\mu$ g/ml) for a week. RFP<sup>+</sup>/GFP<sup>-</sup> cells were further FACS-sorted for  
26 increasing the purity of the population.

27 HiPSCs (XM001 line, Wang et al., 2018) were cultured in E8 flex media with supplement  
28 (Thermo Fisher #A2858501) at 37°C in hypoxia (5% O<sub>2</sub>) conditions, passaged every 3-4  
29 days with accutase, and seeded on Geltrex- (Gibco #A1413302) coated plates. To promote  
30 their attachment to the plates, cells were kept in E8 flex media supplemented with 10  $\mu$ M  
31 Rho-associated protein kinase (ROCK) inhibitor. Media was changed to E8 flex without  
32 ROCK inhibitor within the next 24h from plating.



1 The PA-TetON CasRx cell line was produced with two lentiviruses produced in HEK293T  
2 cells with the PA-TetON plasmid (Yamada et al., 2018) and the TRE-CasRx plasmid, two  
3 packaging plasmids (Addgene #8454 and 8455). 50,000 HEK293T were transduced with a  
4 MOI of 10 of each lentivirus in a 24-well format and then selected for blasticidin expression  
5 (5 µg/ml) for one week.

6 hiPSCs transfections were conducted using Lipofectamine Stem (Thermo Fisher  
7 #STEM00001). For transfections experiments regarding the timecourse of SHH activation  
8 shown in Figures 4 and S5, hiPSCs colonies at 70-80% confluency were dissociated to  
9 single cells with accutase. 250,000 cells were then resuspended in 100ul of E8 flex with  
10 10 µM ROCK inhibitor and seeded on black 96-well plates, previously coated with Geltrex.  
11 After 2-3 h, when cells got attached to the wells, media was changed with 50 µl of E8 flex  
12 with ROCK inhibitor. The transfection was performed as follows: for one sample, 1.2 µl of  
13 Lipofectamine were mixed with 25 µl of Optimem and 500 ng of total plasmids were diluted  
14 in 25 µl of Optimem. Diluted Lipofectamine and diluted plasmids were then combined at a  
15 ratio 1:1, incubated at room temperature for 10 minutes and 50 µl pipetted drop by drop on  
16 top of the cells. Transfection efficiency was assessed by including a control plasmid  
17 encoding for constitutive GFP (pmax-GFP, Lonza, #V4YP-1A24). Media was changed within  
18 7-8 hours after transfection to E8 flex and, prior to light induction, gradually replaced by  
19 neural induction media “COM1”, whose composition is the following: DMEM-F12 (Thermo  
20 Fisher #11320033), N2 supplement (Thermo Fisher #17502048), Neurobasal (Thermo  
21 Fisher #21103049), B27-vitamin A (Thermo Fisher #12587010), 1X Penicillin/Streptomycin,  
22 Glutamax (Thermo Fisher #35050061), 2-mercaptoethanol, vitamin C, CDLC (chemically  
23 defined lipid concentrate) and insulin. The reason of this media switch was due to the fact  
24 that E8 flex contains basic fibroblast growth factor (FGF2), which is a strong inhibitor of the  
25 SHH signalling pathway (Fogarty et al., 2007). Light stimulation was started within 15 hours  
26 post-transfection, using blue LED array. Cells were harvested after each time point of light  
27 stimulation and lysed with 100 µl home-made Trizol. RNA was then extracted with the Zymo  
28 RNA extraction kit (Zymo #R2051). cDNA preparation and qRT PCR were performed as  
29 described in paragraph “RNA extraction, qRT-PCRs”.

30 The plasmids encoding the SCPTS 2.0 systems were generated as previously described  
31 with standard molecular cloning approach (Nihongaki et al., 2017), and with the aim to  
32 produce stable iPSC lines, the modules in these plasmids (split Cas9, MCP, sgRNA

1 cassette) were PCR-amplified and recloned into 2 lentiviral plasmids (pLKO.1 neo, Addgene  
2 #13425; pLJM-EGFP, Addgene #19319) and, from the latter, they were subcloned into two  
3 PiggyBac transposons vectors. With the SCPTS2.0 system we did not succeed in  
4 generating stable lines, neither by lentiviral infections nor by transposase/PiggyBac strategy:  
5 in both cases, we experienced a full cell mortality, perhaps due to some forms of toxicity of  
6 the system. On the other hand, we managed to generate stable iPSCs Cre/Lox SHH and  
7 Cre/Lox CasRx lines by transfecting hiPSCS with PiggyBac vectors and the transposase  
8 enzyme. In this regard, 400,000 hiPSCs were plated in a Geltrex-coated well of a 12 well-  
9 format plate and transfected with lipofectamine. Herein, 400ng of each transposon- one  
10 carrying the “TRE- CRE split1 nMag -T2A/P2A- pMag CRE split2” and the other carrying the  
11 “CAG-loxP-RFP-loxP-CasRx or SHH cassettes”- were combined with 200 ng of hyperactive  
12 transposase and diluted in 72  $\mu$ l of Optimem. Diluted DNA was then mixed with  
13 lipofectamine (3  $\mu$ l), also diluted with Optimem (72  $\mu$ l) and incubated at RT for 10 minutes.  
14 More specific details of the transfection protocol are outlined above. Media was changed to  
15 E8 flex after 5h from transfection. Cells were let recover for 4 days and antibiotics selection  
16 was then started, immediately after splitting hiPSCS: 1 $\mu$ g/ml of puromycin and 2  $\mu$ g/ml of  
17 blasticidin were added to E8 flex medium. Cells were kept under antibiotics selection for 10  
18 days. As a readout of successful integration of the transposons cassettes, RFP signal was  
19 checked.

## 20 Organoids differentiation.

21 HiPSCs were cultured in E8 flex medium (Gibco #A14133-01) with medium replacement  
22 every other day until 80% confluency, in the dark. The differentiation protocol was adapted  
23 from Zheng et al. (2019). HiPSC colonies were rapidly washed with PBS (Pan Biotech  
24 P0436500) and then incubated with accutase (Sigma, #A6964-100ML) for 4 minutes at  
25 37°C. Cells were collected, centrifuged for 3 minutes at 300 g and resuspended in E8 flex  
26 medium containing 10  $\mu$ M Y27632 ROCK inhibitor (VWR, #688000-5). Cells were counted  
27 and plated at a density of 500 cells per well in a 96-well ultra-low attachment U-bottom plate  
28 (Corning, #CLS7007). On the following day, the medium was replaced with fresh N2-B27  
29 medium (50% Neurobasal (Gibco #A3582901), 50% DMEM/F12 (Gibco, #11320074), 1x N2  
30 (Gibco #17504044), 1x B27 (Gibco, #17504044), 1x MEM non-essential amino acids  
31 (Sigma; M7145-100ML), 1x Glutamax (Gibco, #35050038), 0.1  $\mu$ M  $\beta$ -mercaptoethanol  
32 (Merck Millipore #8057400005) supplemented with 2% Geltrex (Gibco, #A1413301), 10  $\mu$ M

1 TGF- $\beta$  pathway inhibitor (SB431542, Stem cell technology, #72234 ) and ) 0.1  $\mu$ M BMP  
2 inhibitor (LDN193189, Stem cell technology, #72147). Medium was exchanged daily. From  
3 day 4 on, organoids were cultured in 35 mm dishes, medium was additionally supplemented  
4 with 1  $\mu$ M retinoic acid (RA, Sigma, #R2625) until day 8. At day 9, RA was removed,  
5 organoids were further cultured in N2B27 medium supplemented with LDN and SB until day  
6 16. For organoids optogenetic stimulations, the same protocol as before was used, but the  
7 medium was supplemented with 1 $\mu$ g/ml doxycycline to activate PA-Cre expression at day  
8 3. On the next day, four organoids at once were embedded in a drop of Geltrex on a glass  
9 bottom dish (WillCo-dish, #GWSB3522), incubated for 15 min at 37°C and covered with  
10 warm N2B27 medium (supplemented with SB, LDN and RA). To induce *SHH* expression in  
11 a restricted pole of the organoids, the laser scanning setup was chosen (Leica Sp8 SMD,  
12 see suppl. video 2): a small square ROI of ca. 100-400  $\mu$ M was selected depending on how  
13 the four organoids were positioned with respect to each other, induced for two times 5  
14 seconds at 100Hz with 1% laser power set at 480 nm, every 30 seconds overnight (16  
15 hours). After induction, organoids were retrieved with a pipette and cultured individually until  
16 day 16 in an ultra-low attachment 24-well plate (Corning #CLS3473). Control organoids were  
17 not induced. Media was exchanged daily with fresh N2B27 supplemented with SB, LDN, 2%  
18 Geltrex and RA until day 8. From day 9 onwards, RA was removed as described before.

### 19 LED board construction and stimulation experiments.

20 For experimental convenience, we decided to build a custom circuit board with 96 blue LEDs  
21 that align with the used 96 well-plates. To control illumination patterns for each well  
22 individually we opted to wire each LED to a dedicated output line of a constant current LED  
23 driver chip (MAX6969). Optimizing for brightness at low supply currents to minimize excess  
24 heat, we decided on the Cree XLamp MLESBL with a documented center wavelength at  
25 485nm and a reported luminous flux of 13.9 lm at 50 mA. We soldered the 96 blue LEDs  
26 onto a custom aluminum PCB. The LED PCB serves as a heat sink and is exposed to the  
27 incubator environment. A dark PVC hole mask reduces light spill. The assembly is encased  
28 in an acrylic frame and the seams sealed with neutrally curing silicone. Two cables leave  
29 the case: one to control the shift registers of the driver chips with a micro-controller outside  
30 of the incubator, and another to power the LEDs (7-9 V) and the logic chips (5V). We used  
31 the serial interface of a micro-controller (Atmel AVR ATmega32) to periodically update the  
32 shift registers of the LED drivers according to the desired patterns and to control the output

1 latches. We opted for a control frequency of 1Hz and specified the illumination patterns with  
2 a simple domain-specific language supporting four instructions: turn on the LED for up to  
3 127 seconds (0x00...0x7E), turn off the LED for up to 127 seconds (0x80...0xFE), repeat the  
4 pattern (0x7F), and halt (0xFF). The code and the schematics for the LED board and the  
5 LED drivers are available at <https://github.com/BIMSBbioinfo/casled>. Stimulations were  
6 performed with a 5-seconds on, 20-seconds off pattern repeated over the desired time  
7 interval (usually 24 hours), with the cell culture plate placed directly on top of the LED board.  
8 To avoid heating, input voltage was set at 7.6V for most experiments (below the optimal  
9 value for the LEDs used) and temperature of the medium in a lit 96-well plate was checked  
10 in a preliminary test with a thermocouple.

### 11 Experimental setup for parallel optogenetic stimulation (DMD setup).

12 Illumination from a DMD-based projector (DLP LightCrafter 4500, Texas Instruments,  
13 modified for on-axis projection by EKB technologies) was coupled to the rear port of an  
14 Observer.Z1 microscope (Zeiss), through a unity magnification relay (2x AC254-125-A-ML,  
15 Thorlabs) with an OD 2.0 neutral density filter (NE20A-A, Thorlabs). For optical stimulation,  
16 illumination from the blue (470 nm) LED of the LightCrafter passed through a GFP filter set  
17 (ET-GFP, Chroma, Bellow Falls, VT, USA) and projected to the sample with a 10x Plan Apo  
18 objective. For imaging of RFP, the green (530nm) LED was used together with a CY3 filter  
19 set (ET-CY3/TRITC, Chroma). Projector / camera pixel mapping and subsequent control of  
20 illumination patterns was performed using the projector plugin for Micromanager 2.0 gamma  
21 (Edelstein et al., 2014). Illumination intensity was controlled using DLP LightCrafter 4500  
22 Control Software (v3.1.0, Texas Instruments). Emission was detected by a back illuminated  
23 sCMOS (PrimeBSI, Teledyne Photometrics). For optogenetic stimulation, samples were  
24 illuminated with 470 nm excitation at a power density of 4.7  $\mu\text{W}/\text{cm}^2$  in user defined regions  
25 of interested (ROIs) for 20 seconds. After stimulation, full field of view RFP images were  
26 acquired. This was repeated every minute for 16 hours using a custom written Beanshell  
27 script in Micromanager. Environmental control during long term time-lapse imaging was  
28 achieved with the Incubator XLmulti S chamber and temperature/CO<sub>2</sub> controllers (PeCon,  
29 Germany).

### 30 Laser scanning setup for single-cell stimulations.

31 Scanning-based optogenetic stimulation experiments were conducted using a confocal  
32 microscope Leica TCS SP8 (Leica Microsystems) equipped with an environmental (CO<sub>2</sub> and

1 temperature) control system. Imaging and stimulation were performed using a 10x Plan APO  
2 objective and a white light laser tuned to 488 nm at 1% laser power. Scanning-based  
3 stimulation of 100 x 100  $\mu\text{m}$  ROI containing a single cell, was performed at 100 Hz  
4 unidirectional scan speed. Two sequential scans were performed resulting in 10 seconds of  
5 total exposure. The stimulation protocol was repeated every 30 seconds for 16 to 20 hours.  
6 The scanning-based stimulation setup mimicked the previous LED stimulation pattern,  
7 although scanning time was set to 10 seconds, instead of 5 seconds LED illumination, in  
8 order to correct for the off-sample scan time.

### 9 RNA extraction, qRT-PCRs.

10 For the experiments shown in figures 2 and 4, RNA extraction was performed as follows.  
11 Cells were harvested by removing medium from 96-well plates, adding 100  $\mu\text{l}$  home-made  
12 Trizol directly onto the cells while keeping the plate on ice, then pipetting up and down a few  
13 times and transferring the lysate into a new 1.5 ml tube. Lysates from two or three wells  
14 were pooled in each replicate, then RNA was extracted with the Zymo Directzol RNA  
15 miniprep kit (Zymo, #R2051), including DNase I digestion. cDNA was synthesized using  
16 100-200 ng RNA with the Maxima H minus RT (Thermo Fisher, #EP0751) according to the  
17 manufacturer protocol and using random hexamers for priming. 5 ng of diluted cDNA were  
18 used per qPCR reaction using ROX-supplemented Biozym SYBR green mastermix  
19 (Biozym, #331416S) and 0.5  $\mu\text{M}$  forward and reverse primers. qPCR reactions were  
20 performed in a AB 7500 machine with the following cycling conditions: 95°C for 10 minutes,  
21 then 40 cycles of 95°C for 15 seconds and 60°C for 1 minutes with fluorescence reading,  
22 and final melting curve step.

### 23 LC-MS proteomics.

24 Cells were transfected and treated as described in the dedicated section. They were then  
25 checked by fluorescence after 36h for RFP knock-down and processed for proteomic  
26 analysis as follows. Cells were resuspended in 350  $\mu\text{l}$  of Urea buffer (8 M Urea, 100 mM  
27 Tris-HCl, pH 8.2). Cells were lysed on a Bioruptor sonicator (Diagenode), using 10 cycles of  
28 sonication (45 sec ON, 15 sec OFF). Protein concentration was determined by bicinchoninic  
29 acid colorimetric assay (Pierce) and a 100  $\mu\text{g}$  aliquot of each protein sample was reduced  
30 with 10 mM DTT for 45 minutes at 30 °C and alkylated with 100 mM iodoacetamide for 25  
31 minutes at 25 °C. Proteins were digested using Lys-C (Wako, 1:40, w/w, overnight under  
32 gentle shaking at 30°C) and modified trypsin (Promega, 1:60, w/w, 4 hours under rotation

1 at 30°C). Lys-C digestions product were diluted four times with 50 mM ammonium  
2 bicarbonate before the tryptic digestion, which was stopped through acidification with 5 µl of  
3 trifluoroacetic acid (Merck). Fifteen µg of each resulting peptide mixture were then desalted  
4 on Stage Tip (Rappsilber et.al., 2007), the eluates dried and reconstituted to 15 µL in 0.5%  
5 acetic acid. For all the samples, 5 microliters were injected on a LC-MS/MS system (EASY-  
6 nLC 1200 coupled to Q Exactive HF, Thermo), using a 240 minutes gradient ranging from  
7 2% to 50% of solvent B (80% acetonitrile, 0.1% formic acid; solvent A=0.1% formic acid in  
8 water). Each sample was analyzed in duplicate. For the chromatographic separation 30 cm  
9 long capillary (75 µm inner diameter) was packed with 1.9 µm C18 beads (Reprosil-AQ, Dr.  
10 Maisch HPLC). On one end of the capillary nanospray tip was generated using a laser puller,  
11 allowing fretless packing (P-2000 Laser Based Micropipette Puller, Sutter Instruments). The  
12 nanospray source was operated with a spray voltage of 2.0 kV and an ion transfer tube  
13 temperature of 260 °C. Data were acquired in data dependent mode, with one survey MS  
14 scan in the Orbitrap mass analyzer (120,000 resolution at 200 m/z) followed by up to 10  
15 MS/MS scans (30,000 resolution at 200 m/z) on the most intense ions. Normalized collision  
16 energy was set to 26, Once selected for fragmentation, ions were excluded from further  
17 selection for 30 s, in order to increase new sequencing events. Proteomics data processing  
18 and analysis Raw data were analyzed using the MaxQuant proteomics pipeline (v1.6.10.43)  
19 and the built in the Andromeda search engine (Cox et al., 2011) with the Uniprot Human  
20 database. Carbamidomethylation of cysteines was chosen as fixed modification, oxidation  
21 of methionine and acetylation of N-terminus were chosen as variable modifications. The  
22 search engine peptide assignments were filtered at 1% FDR and the feature match between  
23 runs was enabled. For protein quantification LFQ intensities calculated by MaxQuant were  
24 used (Cox et al., 2014). The minimum LFQ ratio count was set to 2 and a MS/MS spectrum  
25 was always required for LFQ comparison of the precursor ion intensities. Data quality was  
26 inspected using the in-house developed tool PTXQC (Bielow et al, 2016). After removing  
27 reverse and contaminants hits, LFQ intensities were log<sub>2</sub> transformed and proteins with less  
28 than four valid values in each condition were filtered out. Proteins with differential expression  
29 between conditions were test with Student's ttest with Benjamini-Hochberg FDR set at 0.05.  
30 Processed data are available in the supplementary table 1.

31 Bulk RNA sequencing.

1 Cells were treated exactly as for the proteomics experiment and as described in the  
2 dedicated section, in two additional replicates per condition. RNA was extracted with home-  
3 made Trizol by organic phase separation and RNA precipitation. Total RNA-seq libraries  
4 were performed as follows: 1  $\mu$ g of total RNA per sample was first depleted of ribosomal  
5 RNA using the RiboCop rRNA Depletion Kit (Lexogen, #144) according to the  
6 manufacturer's instruction. The rRNA-depleted samples were then processed with the  
7 TruSeq mRNA stranded kit from Illumina. Libraries were then sequenced on a Nextseq with  
8 1x76 cycles. Fastq data were generated with the bcl2fastq program and fed to the PiGx  
9 analysis pipeline (Wurmus et al., 2018), which was used with default settings with a custom  
10 reference GRCh38 human genome supplemented with two extra chromosomes carrying the  
11 CasRx-T2A-GFP cassette and the TagRFP cassette, and a custom annotation made of the  
12 Gencode v34 human annotation supplemented with two extra entries for the CasRx-T2A-  
13 GFP and the TagRFP genes. For further analyses, we used the STAR/Deseq2 PiGx output.

#### 14 Live cell imaging for GFP and RFP quantification.

15 After 6, 12, 25 or 50 hours of light induction or the respective dark controls, images for GFP  
16 and RFP were acquired on an inverted Nikon Ti-E microscope with a 4x NA1.4 objective  
17 and Andor iXON Ultra DU-888 camera; Z stacks had 1.5  $\mu$ m spacing over a 40  $\mu$ m range.  
18 GFP: 300ms exposure; Sola 50% on 6-12h, 12% on 25-50h. RFP: 100ms exposure; Sola  
19 20%. All these images were taken with live cells in black 96-well plates. Z-stacks were used  
20 for max intensity projection within imageJ, and the projection were used for signal  
21 quantification with a macro running the imageJ *Subtract Background* plugin with a rolling  
22 ball radius of 50, and then the *Measure* function for signal intensity. This quantification  
23 assumes that all wells contain on average the same number of cells, which were seeded in  
24 the beginning of the experiment. For some of the wells, we noticed a pipetting artifact on a  
25 side, producing an area devoid of cells. We manually selected a ROI which excluded this  
26 area for all wells, and we applied this ROI before running the signal measurement macro.  
27 This experiment was performed blindly: IL transfected the cells and performed the light  
28 stimulation, then CCJ performed the imaging without knowing the samples labels, then IL  
29 ran the macros and reassigned the original labels.

#### 30 Immunofluorescence of hiPSCs and organoids.

31 HiPSCs or organoids were rapidly washed in cold PBS and fixed in 4% PFA for 10 minutes  
32 in a multi-well plate with agitation. For whole-mount imaging, permeabilization and blocking

1 were performed for 1h at room temperature in PBS solution containing 0.1% Triton-X, 0.2%  
2 BSA and 4% normal donkey serum. Organoids were subsequently incubated with primary  
3 antibodies overnight at 4°C in blocking solution (PBS supplemented with 0.2% BSA and 4%  
4 normal donkey serum). The following primary antibodies were used in immunostaining: Anti-  
5 FOXA2 (R&D systems, #AF2400; 1:100), Anti-OLIG2 (Sigma, #HPA003254-100UL;  
6 1:1000), Anti-NKX6.1 (Sigma, #HPA036774-100UL; 1:500). On the following day,  
7 hiPSCs/organoids were washed 3 times for 10 minutes, with agitation, with washing solution  
8 (PBS supplemented with 0.1% Triton-X, 0.2% BSA). Secondary antibodies and DAPI  
9 (Sigma, #D9542) were then incubated at room temperature for 1h in blocking solution. The  
10 following secondary antibodies were used at 1:1000 dilution in blocking solution: Alexa Fluor  
11 647 anti-Rabbit (Thermo Fisher, #A21244), Alexa Fluor 647 anti-Goat (Thermo Fisher,  
12 #A21447), depending on the primary antibody. Samples were then washed again 3 times  
13 for 10 minutes, with agitation, in washing solution. For mounting, the organoids were placed  
14 in the center of a slide, washing solution was carefully removed and one drop of Prolong  
15 Gold antifade reagent (Thermo Fisher, #P36930) was placed on top of each organoid. A  
16 coverslip was placed on top and the slides were allowed to dry at room temperature  
17 overnight in the dark. For hiPSCs, the mounting media was added directly in the cell culture  
18 plates were cells were seeded (Thermo Fisher, #P10144).

19 For organoids slices: after fixation, organoids were allowed to settle in 1 mL 40% sucrose  
20 solution overnight at 4°C. On the following day, they were embedded in 13%/10%  
21 gelatin/sucrose solution and positioned inside an embedding mold (Sakura #4566), rapidly  
22 moved to dry ice to freeze and then placed at -80°C for storage. Blocks were removed from  
23 -80°C and allowed to warm inside the cryostat to sectioning temperature (-20°C) for 15  
24 minutes. Sectioning was performed using a cryostat (Thermo Fisher Cryostar NX70) and  
25 set to produce 10µm-thick slices. Cut sections were collected on slides (Thermo Fisher  
26 ,#J1800AMNZ) and stored at -80°C for long-term. To perform immunostaining, slides were  
27 allowed to warm to room temperature for 10 minutes, incubated for 5 minutes with 37°C  
28 PBS to remove embedding solution. Permeabilization and blocking, as well as incubation  
29 with primary and secondary antibodies, were done as described above for whole-mount  
30 organoids.



1 Images were acquired using an Sp8 confocal microscope (Leica SP8 SMD) using a 10X dry  
2 or a 20x immersion objective. Z-stacks and final images were processed using Fiji-ImageJ,  
3 to produce maximal intensity projections and to subtract background.

#### 4 Spatial transcriptomics experiments.

5 PET membranes (Millipore Millicell Hanging Cell Culture Insert, PET 3  $\mu\text{m}$ , 24-well,  
6 #MCSP24H48) were positioned in glass bottom black 24-well plate (Greiner Bio-one,  
7 #662892), after cutting away the plastic holders, hence making the membrane touch the  
8 bottom of the well with no gaps in-between (this step was performed to ensure no light  
9 scattering or diffusion). Circular black photomasks were stuck underneath the bottom of  
10 the plate. Membranes were coated with 100  $\mu\text{l}$  of cold Geltrex. iPSCs were splitted to single  
11 cells, as described above, and 275,000 cells resuspended in 100ul were cultured on coated  
12 membranes generating a stable monolayer. Additional warm E8 media (300  $\mu\text{l}$ ) was pipetted  
13 around the plastic scaffold. Plates were incubated at 37°C for 2/3 hours until cells  
14 attachment. Samples were prepared in duplicates with the intent to perform control  
15 quantifications for each of those prior to the final Visium experiment. Plates were kept  
16 wrapped in aluminum foil to avoid light exposure. Before starting with the first 24h of light  
17 induction, media was changed to  $\frac{1}{2}$  E8 flex +  $\frac{1}{2}$  COM1 and 1 $\mu\text{g}/\text{ml}$  of doxycycline.

18 The plate with the cells to be induced was covered on top by a black velvet lid and positioned  
19 onto the blue LED plate. The control sample (0h) was kept in the dark during the whole time  
20 course. Media was changed to  $\frac{1}{4}$  E8 flex and  $\frac{3}{4}$  COM1 between 24h and 48h of induction.  
21 Finished the time course, the 4 samples were transferred to a Visium Spatial Gene  
22 expression slide (10X Genomics) as follows: the plastic structure that surrounds the  
23 membrane was carefully held with tweezers and turned upside down to get rid of the media;  
24 membranes were delicately washed twice with 100  $\mu\text{l}$  of PBS and, by using a scalpel,  
25 delicately isolated from the plastic device. By using tweezers, the membranes were then  
26 slowly stuck onto a Visium Spatial Gene Expression slide with cells facing on it. The more  
27 the membrane was kept flat, the more efficient the cells transfer. The Visium Spatial Gene  
28 Expression protocol was followed, according to manufacturer instructions (10X Genomics.).

29 Fastq files were first processed for retrieving transcript counts with positional information  
30 with the spaceranger software (10X Genomics, v. 1.2.0). The output of spaceranger was  
31 loaded into Seurat (v. 4.0) within RStudio with R 4.0.4, and each sample was subsetted into  
32 7 concentric circles with the center being set according to the stimulation pattern observed

1 by fluorescent microscopy (and after checking that different radii would yield stable results  
2 in the samples with SHH induction, subsetting from 5 to 10 concentric circles and finally  
3 settling for an intermediate size). The central spots selected for each sample from 0 to 120h  
4 had the following barcodes: CACATGATTCAGCAAC, CAATTTTCGTATAAGGG,  
5 CAATTTTCGTATAAGGG, GGAGGGCTTGTTGGC (the latter north-west from the physical  
6 center as the induction was not centered). At this point, concentric circles were drawn by  
7 taking all spots with a distance from the center < 500, 775, 1050, 1325, 1600, 1825 and >  
8 1825 for the c1-c7 areas. Within these subsets of spots, the transcript counts for a *SHH*  
9 gene set comprising *SHH*, *NKX6-1*, *NKX6-2*, *NKX2-2*, *NKX2-1*, *FOXA2*, *FOXG1* and *OLIG2*  
10 were added and normalized for the total transcript counts of each subset, and then further  
11 normalized by the mean of the counts for all spatial subsets c1-c7. As controls, we either  
12 randomized the genes in the gene set 1000 times, or the center spot 1000 times, and then  
13 computed an exact p-value for each subset gene set enrichment testing the hypothesis of  
14 the enrichment being larger than the random control. The signal was stable with varying  
15 binning sizes (from 6 to 9), and over cumulative analysis (Fig. S5m).  
16 Plasmids.

17 Supplementary table 2 contains the name, description and information on availability on the  
18 plasmids used in this study.

19 qRT-PCR primer pairs.

20 For qRT-PCR measurements of target RNAs, we used the following forward and reverse  
21 primers.

22 ASCL1 fw: CTTACACCAACTGGTTCTGAGG

23 ASCL1 rv: CAACGCCACTGACAAGAAAGC

24 CDR1as fw: ACGTCTCCAGTGTGCTGA

25 CDR1as rv: CTTGACACAGGTGCCATC

26 STAT3 fw: AACATGGAAGAATCCAACAACGG

27 STAT3 rv: TCTCAAAGGTGATCAGGTGCAG

28 GAPDH fw: AAGGTGAAGGTCGGAGTCAAC

29 GAPDH rv: GGGGTCATTGATGGCAACAATA

30 HPRT fw: ACCCCACGAAGTGTGGATA

31 HPRT rv: AAGCAGATGGCCACAGAACT

32 SHH fw: AAGGATGAAGAAAACACCGGAGCG

1 SHH rv: ATATGTGCCTTGGACTCGTAGTAC  
2 BMP4 fw: GCTGCTGAGGTTAAAGAGGAAACGA  
3 BMP4 rv: CACTCGGTCTTGAGTATCCTGAG  
4 FOXA2 fw: CCGTTCTCCATCAACAACCT  
5 FOXA2 rv: GGGGTAGTGCATCACCTGTT  
6 FOXG1 fw: CACTGCCTCCTAGCTTGTCC  
7 FOXG1 rv: TGAAGCTGATGATGCCGTTG  
8 OLIG2 fw: CCAGAGCCCGATGACCTTTTT  
9 OLIG2 rv: CACTGCCTCCTAGCTTGTCC  
10 NKX2-2 fw: CCGGGCCGAGAAAGGTATG  
11 NKX2-2 rv: GTTTGCCGTCCCTGACCAA  
12 NKX6-2 fw: GAGGACGACGACGAATACAAC  
13 NKX6-2 rv: GTTCGAGGGTTTGTGCTTCTT

14 guide RNA sequences.

15 For most luciferase knock-downs, we used the previously validated PS18 crRNA and non-  
16 targeting control (NT) (Abuddayeh et al., 2016) for both Psp-Cas13b and CasRx, while  
17 the complementary sequence was cloned downstream of the Renilla luciferase reporter  
18 cassette in a psiCHECK-2 plasmid (Promega). The same target sequence was also cloned  
19 downstream of a TagRFP reporter cassette in an ePB-BSD-TT piggyback vector (see  
20 plasmids) for testing constitutive and light-inducible CasRx knock-downs. For the RSD  
21 tethering experiments, the 3'UTR was further swapped with another validated protospacer  
22 sequence (Cox et al., 2017), targeting the KRAS mRNA. The CDR1as crRNAs were  
23 designed on the CDR1as backsplice junction. The STAT3 mRNA crRNA sequence was  
24 taken from Konermann et al. (2018), while the FOXA2 crRNA sequences were designed  
25 according to Wessels et al. (2020). All guide RNA sequences were cloned into the pr026  
26 plasmid, carrying either the Psp-Cas13b or CasRx direct repeat with two adjacent BbsI  
27 restriction sites for guide cloning (see plasmids).

28 NT guide: GTAATGCCTGGCTTGTGCGACGCATAGTCTG  
29 PS18 guide (luciferase and TagRFP 3'UTR): CATGCCTGCAGGTGCGAGTAGATTGCTGT  
30 KRAS guide (luciferase 3'UTR): AAATAAATGGTGAATATCTTCAAATGATTT  
31 CDR1as PS1 guide: GTGCCATCGGAAACCCTGGATATTGCAGAC  
32 CDR1as PS2 guide: CCATCGGAAACCCTGGATATTGCAGACAC

1 STAT3 guide: ATACAATTGGCTCGGCCCCATTCCCACA

2 FOXA2 PS1 guide: TAAGCCATAAATAAAGCACGCAG

3 FOXA2 PS2 guide: CAGTTTAAAATTTAACAGCCACA

4 For the light-inducible CRISPRa experiments, we used the Tet6 sgRNA spacer sequence  
5 reported below, targeting CaSP1/2 and GAL4/UAS promoters. A sgRNA plasmid without  
6 any spacer cloned was used as a non-targeting guide control. We report below also all the  
7 tested guide RNA sequences for SHH and BMP4, designed after the Calabrese library  
8 (Sanson et al., 2018). All guides were cloned into the psgRNA2.0 plasmid carrying the  
9 SpCas9 sgRNA scaffold with two MS2 aptamers (Nihongaki et al., 2017, see plasmids).

10 Non-targeting guide: GAACGACTAGTTAGGCGTGTA

11 ASCL1 guide: GCAGCCGCTCGCTGCAGCAG

12 Tet6 guide: GTCTTCGGAGGACAGTACTC

13 SHH guide 1: CATCAGAAGACAAGCTTGTG

14 SHH guide 2: AAAAAACGTAGTCTTCTTCA

15 SHH guide 3: TTTCCTAAGATAAAGGTGGG

16 BMP4 guide 1: CTCGCTCGCCTCCCTTTCTG

17 BMP4 guide 2: GGGGCTCCCATCCCCAGAAA

18 BMP4 guide 3: GCCTGCTAGGCGAGGTCTGGG

19

20

1 **Bibliography (by first author alphabetical order)**

2

3 C2c2 is a single-component programmable RNA-guided RNA-targeting CRISPR effector.

4 Abudayyeh OO, Gootenberg JS, Konermann S, Joung J, Slaymaker IM, Cox DB, Shmakov  
5 S, Makarova KS, Semenova E, Minakhin L, Severinov K, Regev A, Lander ES, Koonin EV,  
6 Zhang F. *Science*. 2016 Aug 5;353(6299):aaf5573. doi: 10.1126/science.aaf5573. Epub  
7 2016 Jun 2.

8

9 RNA targeting with CRISPR-Cas13.

10 Abudayyeh OO, Gootenberg JS, Essletzbichler P, Han S, Joung J, Belanto JJ, Verdine V,  
11 Cox DBT, Kellner MJ, Regev A, Lander ES, Voytas DF, Ting AY, Zhang F. *Nature*. 2017  
12 Oct 12;550(7675):280-284. doi: 10.1038/nature24049. Epub 2017 Oct 4.

13

14 Proteomics Quality Control: Quality Control Software for MaxQuant Results.

15 Bielow C, Mastrobuoni G, Kempa S. *J Proteome Res*. 2016 Mar 4;15(3):777-87. doi:  
16 10.1021/acs.jproteome.5b00780. Epub 2015 Dec 28.

17

18 RNA editing with CRISPR-Cas13.

19 Cox DBT, Gootenberg JS, Abudayyeh OO, Franklin B, Kellner MJ, Joung J, Zhang F.  
20 *Science*. 2017 Nov 24;358(6366):1019-1027. doi: 10.1126/science.aaq0180. Epub 2017  
21 Oct 25.

22

23 Andromeda: a peptide search engine integrated into the MaxQuant environment.

24 Cox J, Neuhauser N, Michalski A, Scheltema RA, Olsen JV, Mann M. *J Proteome Res*.  
25 2011 Apr 1;10(4):1794-805. doi: 10.1021/pr101065j. Epub 2011 Feb 22.

26

27 Accurate proteome-wide label-free quantification by delayed normalization and maximal  
28 peptide ratio extraction, termed MaxLFQ.

- 1 Cox J, Hein MY, Luber CA, Paron I, Nagaraj N, Mann M.  
2 Mol Cell Proteomics. 2014 Sep;13(9):2513-26. doi: 10.1074/mcp.M113.031591. Epub  
3 2014 Jun 17.  
4  
5 Specification of positional identity in forebrain organoids.  
6 Cederquist GY, Ascioffa JJ, Tchieu J, Walsh RM, Cornacchia D, Resh MD, Studer L. Nat  
7 Biotechnol. 2019 Apr;37(4):436-444. doi: 10.1038/s41587-019-0085-3. Epub 2019 Apr 1.  
8  
9 Ago-TNRC6 triggers microRNA-mediated decay by promoting two deadenylation steps.  
10 Chen CY, Zheng D, Xia Z, Shyu AB. Nat Struct Mol Biol. 2009 Nov;16(11):1160-6. doi:  
11 10.1038/nsmb.1709. Epub 2009 Oct 18.  
12  
13 RNA imaging. Spatially resolved, highly multiplexed RNA profiling in single cells.  
14 Chen KH, Boettiger AN, Moffitt JR, Wang S, Zhuang X. Science. 2015 Apr  
15 24;348(6233):aaa6090. doi: 10.1126/science.aaa6090. Epub 2015 Apr 9.  
16  
17 A multifunctional AAV-CRISPR-Cas9 and its host response.  
18 Chew WL, Tabebordbar M, Cheng JKW, Mali P, Wu EY, Ng AHM, Zhu K, Wagers AJ,  
19 Church GM. Nat Methods. 2016 Oct;13(10):868-74. doi: 10.1038/nmeth.3993. Epub 2016  
20 Sep 5.  
21  
22 Self-organization of human dorsal-ventral forebrain structures by light induced SHH.  
23 De Santis R, Etoc F, Rosado-Olivieri AE, Brivanlou HA. bioRxiv. 2021 (preprint).  
24  
25 Advanced methods of microscope control using  $\mu$ Manager software.  
26 Edelstein AD, Tsuchida MA, Amodaj N, Pinkard H, Vale RD, Stuurman N. Journal of  
27 Biological Methods. 2014 1(2):e11 doi:10.14440/jbm.2014.36

1

2 Fibroblast growth factor blocks Sonic hedgehog signaling in neuronal precursors and tumor  
3 cells.

4 Fogarty MP, Emmenegger BA, Graseder LL, Oliver TG, Wechsler-Reya RJ.

5 Proc Natl Acad Sci U S A. 2007 Feb 20;104(8):2973-8. doi: 10.1073/pnas.0605770104.

6 Epub 2007 Feb 13.

7

8 Engineered pairs of distinct photoswitches for optogenetic control of cellular proteins.

9 Kawano F, Suzuki H, Furuya A, Sato M. Nat Commun. 2015 Feb 24;6:6256. doi:  
10 10.1038/ncomms7256.

11

12 Rapid blue-light-mediated induction of protein interactions in living cells.

13 Kennedy MJ, Hughes RM, Peteya LA, Schwartz JW, Ehlers MD, Tucker CL. Nat Methods.

14 2010 Dec;7(12):973-5. doi: 10.1038/nmeth.1524. Epub 2010 Oct 31.

15

16 Multiple Input Sensing and Signal Integration Using a Split Cas12a System.

17 Kempton HR, Goudy LE, Love KS, Qi LS. Mol Cell. 2020 Apr 2;78(1):184-191.e3. doi:

18 10.1016/j.molcel.2020.01.016. Epub 2020 Feb 5.

19

20 Transcriptome Engineering with RNA-Targeting Type VI-D CRISPR Effectors.

21 Konermann S, Lotfy P, Brideau NJ, Oki J, Shokhirev MN, Hsu PD. Cell. 2018 Apr

22 19;173(3):665-676.e14. doi: 10.1016/j.cell.2018.02.033. Epub 2018 Mar 15.

23

24 Neural Progenitors Adopt Specific Identities by Directly Repressing All Alternative

25 Progenitor Transcriptional Programs.

26 Kutejova E, Sasai N, Shah A, Gouti M, Briscoe J. Dev Cell. 2016 Mar 21;36(6):639-53. doi:

27 10.1016/j.devcel.2016.02.013. Epub 2016 Mar 10.

28

- 1 Highly multiplexed subcellular RNA sequencing in situ.
- 2 Lee JH, Daugharthy ER, Scheiman J, Kalhor R, Yang JL, Ferrante TC, Terry R, Jeanty SS,  
3 Li C, Amamoto R, Peters DT, Turczyk BM, Marblestone AH, Inverso SA, Bernard A, Mali P,  
4 Rios X, Aach J, Church GM. *Science*. 2014 Mar 21;343(6177):1360-3. doi:  
5 10.1126/science.1250212. Epub 2014 Feb 27.
- 6
- 7 Morphogen gradient reconstitution reveals Hedgehog pathway design principles.
- 8 Li P, Markson JS, Wang S, Chen S, Vachharajani V, Elowitz MB. *Science*. 2018 May  
9 4;360(6388):543-548. doi: 10.1126/science.aao0645. Epub 2018 Apr 5.
- 10
- 11 Improved Tet-responsive promoters with minimized background expression.
- 12 Loew R, Heinz N, Hampf M, Bujard H, Gossen M. *BMC Biotechnol*. 2010 Nov 24;10:81. doi:  
13 10.1186/1472-6750-10-81.
- 14
- 15 Spatiotemporal dynamics of molecular pathology in amyotrophic lateral sclerosis.
- 16 Maniatis S, Äijö T, Vickovic S, Braine C, Kang K, Mollbrink A, Fagegaltier D, Andrusivová Ž,  
17 Saarenpää S, Saiz-Castro G, Cuevas M, Watters A, Lundeberg J, Bonneau R, Phatnani H.  
18 *Science*. 2019 Apr 5;364(6435):89-93. doi: 10.1126/science.aav9776.
- 19
- 20 Light-dependent RNA interference with nucleobase-caged siRNAs.
- 21 Mikat V, Heckel A. *RNA*. 2007 Dec;13(12):2341-7. doi: 10.1261/rna.753407. Epub 2007 Oct  
22 19.
- 23
- 24 Museum of Spatial Transcriptomics.
- 25 Moses L, Pachter L. bioRxiv, 2021.
- 26
- 27 A novel phosphorylation-independent interaction between SMG6 and UPF1 is essential for  
28 human NMD.



- 1 Nicholson P, Josi C, Kurosawa H, Yamashita A, Mühlemann O. *Nucleic Acids Res.* 2014  
2 Aug;42(14):9217-35. doi: 10.1093/nar/gku645. Epub 2014 Jul 22.
- 3
- 4 Photoactivatable CRISPR-Cas9 for optogenetic genome editing.
- 5 Nihongaki Y, Kawano F, Nakajima T, Sato M. *Nat Biotechnol.* 2015 Jul;33(7):755-60. doi:  
6 10.1038/nbt.3245. Epub 2015 Jun 15.
- 7
- 8 CRISPR-Cas9-based photoactivatable transcription system.
- 9 Nihongaki Y, Yamamoto S, Kawano F, Suzuki H, Sato M. *Chem Biol.* 2015 Feb  
10 19;22(2):169-74. doi: 10.1016/j.chembiol.2014.12.011. Epub 2015 Jan 22.
- 11
- 12 CRISPR-Cas9-based photoactivatable transcription systems to induce neuronal  
13 differentiation.
- 14 Nihongaki Y, Furuhashi Y, Otabe T, Hasegawa S, Yoshimoto K, Sato M. *Nat Methods.* 2017  
15 Oct;14(10):963-966. doi: 10.1038/nmeth.4430. Epub 2017 Sep 11.
- 16
- 17 Gene expression cartography.
- 18 Nitzan M, Karaiskos N, Friedman N, Rajewsky N. *Nature.* 2019 Dec;576(7785):132-137.  
19 doi: 10.1038/s41586-019-1773-3. Epub 2019 Nov 20.
- 20
- 21 Optoribogenetic control of regulatory RNA molecules.
- 22 Pilsl S, Morgan C, Choukeife M, Möglich A, Mayer G. *Nat Commun.* 2020 Sep  
23 24;11(1):4825. doi: 10.1038/s41467-020-18673-5.
- 24
- 25 A light-inducible CRISPR-Cas9 system for control of endogenous gene activation.
- 26 Polstein LR, Gersbach CA. *Nat Chem Biol.* 2015 Mar;11(3):198-200. doi:  
27 10.1038/nchembio.1753. Epub 2015 Feb 9.
- 28

1 Protocol for micro-purification, enrichment, pre-fractionation and storage of peptides for  
2 proteomics using StageTips.

3 Rappsilber J, Mann M, Ishihama Y. Nat Protoc. 2007;2(8):1896-906. doi:  
4 10.1038/nprot.2007.261.

5  
6 A LOV2 domain-based optogenetic tool to control protein degradation and cellular function.  
7 Renicke C, Schuster D, Usherenko S, Essen LO, Taxis C. Chem Biol. 2013 Apr  
8 18;20(4):619-26. doi: 10.1016/j.chembiol.2013.03.005.

9  
10 Establishing and interpreting graded Sonic Hedgehog signaling during vertebrate neural  
11 tube patterning: the role of negative feedback.

12 Ribes V, Briscoe J. Cold Spring Harb Perspect Biol. 2009 Aug;1(2):a002014. doi:  
13 10.1101/cshperspect.a002014.

14  
15 Slide-seq: A scalable technology for measuring genome-wide expression at high spatial  
16 resolution.

17 Rodriques SG, Stickels RR, Goeva A, Martin CA, Murray E, Vanderburg CR, Welch J, Chen  
18 LM, Chen F, Macosko EZ. Science. 2019 Mar 29;363(6434):1463-1467. doi:  
19 10.1126/science.aaw1219. Epub 2019 Mar 28.

20  
21 Optimized libraries for CRISPR-Cas9 genetic screens with multiple modalities.

22 Sanson KR, Hanna RE, Hegde M, Donovan KF, Strand C, Sullender ME, Vaimberg EW,  
23 Goodale A, Root DE, Piccioni F, Doench JG. Nat Commun. 2018 Dec 21;9(1):5416. doi:  
24 10.1038/s41467-018-07901-8.

25  
26 In Situ Transcription Profiling of Single Cells Reveals Spatial Organization of Cells in the  
27 Mouse Hippocampus.

1 Shah S, Lubeck E, Zhou W, Cai L. *Neuron*. 2016 Oct 19;92(2):342-357. doi:  
2 10.1016/j.neuron.2016.10.001.

3  
4 Visualization and analysis of gene expression in tissue sections by spatial transcriptomics.  
5 Ståhl PL, Salmén F, Vickovic S, Lundmark A, Navarro JF, Magnusson J, Giacomello S, Asp  
6 M, Westholm JO, Huss M, Mollbrink A, Linnarsson S, Codeluppi S, Borg Å, Pontén F,  
7 Costea PI, Sahlén P, Mulder J, Bergmann O, Lundeberg J, Frisén J. *Science*. 2016 Jul  
8 1;353(6294):78-82. doi: 10.1126/science.aaf2403.

9  
10 LOVTRAP: an optogenetic system for photoinduced protein dissociation.

11 Wang H, Vilela M, Winkler A, Tarnawski M, Schlichting I, Yumerefendi H, Kuhlman B, Liu  
12 R, Danuser G, Hahn KM. *Nat Methods*. 2016 Sep;13(9):755-8. doi: 10.1038/nmeth.3926.  
13 Epub 2016 Jul 18.

14  
15 Genome-wide analysis of PDX1 target genes in human pancreatic progenitors.  
16 Wang X, Sterr M, Burtscher I, Chen S, Hieronimus A, Machicao F, Staiger H, Häring HU,  
17 Lederer G, Meitinger T, Cernilogar FM, Schotta G, Irmeler M, Beckers J, Hrabě de Angelis  
18 M, Ray M, Wright CVE, Bakhti M, Lickert H. *Mol Metab*. 2018 Mar;9:57-68. doi:  
19 10.1016/j.molmet.2018.01.011. Epub 2018 Jan 31.

20  
21 Massively parallel Cas13 screens reveal principles for guide RNA design.

22 Wessels HH, Méndez-Mancilla A, Guo X, Legut M, Daniloski Z, Sanjana NE. *Nat*  
23 *Biotechnol*. 2020 Jun;38(6):722-727. doi: 10.1038/s41587-020-0456-9. Epub 2020 Mar 16.

24  
25 PiGx: reproducible genomics analysis pipelines with GNU Guix.

26 Wurmus R, Uyar B, Osberg B, Franke V, Gosdschan A, Wreczycka K, Ronen J, Akalin A.  
27 *Gigascience*. 2018 Dec 1;7(12):giy123. doi: 10.1093/gigascience/giy123.

28

1 Spatial transcriptome profiling by MERFISH reveals subcellular RNA compartmentalization  
2 and cell cycle-dependent gene expression.

3 Xia C, Fan J, Emanuel G, Hao J, Zhuang X. Proc Natl Acad Sci U S A. 2019 Sep  
4 24;116(39):19490-19499. doi: 10.1073/pnas.1912459116. Epub

5

6 Light Control of the Tet Gene Expression System in Mammalian Cells.

7 Yamada M, Suzuki Y, Nagasaki SC, Okuno H, Imayoshi I. Cell Rep. 2018 Oct 9;25(2):487-  
8 500.e6. doi: 10.1016/j.celrep.2018.09.026.

9

10 A split-Cas9 architecture for inducible genome editing and transcription modulation.

11 Zetsche B, Volz SE, Zhang F. Nat Biotechnol. 2015 Feb;33(2):139-42. doi:  
12 10.1038/nbt.3149.

13

14 Structural Basis for the RNA-Guided Ribonuclease Activity of CRISPR-Cas13d.

15 Zhang C, Konermann S, Brideau NJ, Lotfy P, Wu X, Novick SJ, Strutzenberg T, Griffin PR,  
16 Hsu PD, Lyumkis D. Cell. 2018 Sep 20;175(1):212-223.e17. doi:  
17 10.1016/j.cell.2018.09.001.

18

19 Dorsal-ventral patterned neural cyst from human pluripotent stem cells in a neurogenic  
20 niche.

21 Zheng Y, Xue X, Resto-Irizarry AM, Li Z, Shao Y, Zheng Y, Zhao G, Fu J. Sci Adv. 2019  
22 Dec 11;5(12):eaax5933. doi: 10.1126/sciadv.aax5933. eCollection 2019 Dec.

23

24 A Single-Chain Photoswitchable CRISPR-Cas9 Architecture for Light-Inducible Gene  
25 Editing and Transcription.

26 Zhou XX, Zou X, Chung HK, Gao Y, Liu Y, Qi LS, Lin MZ. ACS Chem Biol. 2018 Feb  
27 16;13(2):443-448. doi: 10.1021/acscchembio.7b00603. Epub 2017 Sep 29.

28

1 **Figures and legends**

2

3 **Figure 1**

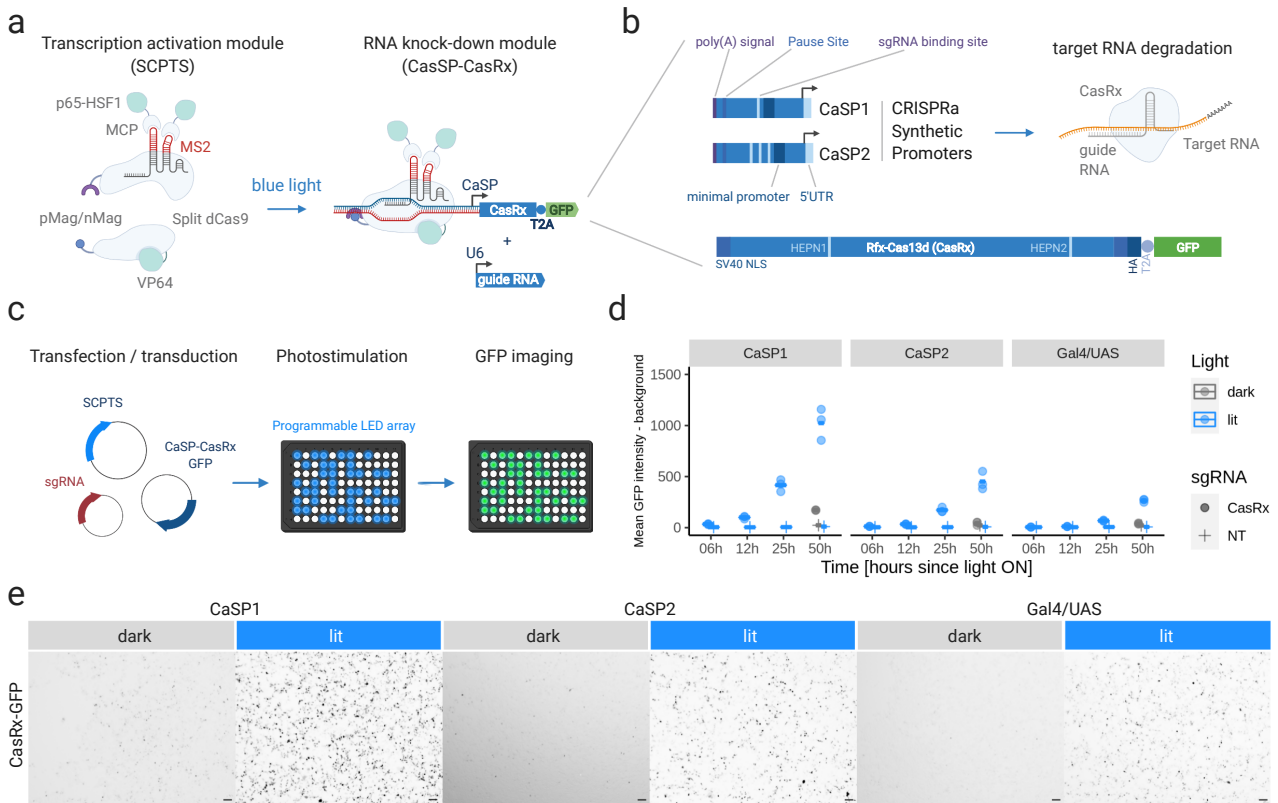

4

5 **Figure 1. Light-inducible transcription of CasRx.**

6 **a.** Left: light-inducible transcription activation module (SCPTS, Nihongaki et al., 2017). The Cas9 sgRNA is  
 7 shown associated to the N-ter part of dCas9 in the dark state. Right: RNA knock-down module: CasRx  
 8 transcription is driven by a synthetic promoter controlled by the SCPTS module. A guide RNA for targeted  
 9 knock-downs can be co-expressed from a U6 promoter. **b.** Synthetic promoters for light-inducible transcription  
 10 of CasRx (CaSP1/2), containing upstream elements for reducing spurious transcription (poly(A) site, pause  
 11 site), a minimal CMV promoter containing TFIIB binding site/TATA box, an initiator and synthetic 5'UTR, one  
 12 or three sgRNA binding sites. The CasRx cassette (below) contains a T2A-GFP tag, two nuclear localization  
 13 signals (NLS) and an HA tag, as in Konermann et al. (2018). HEPN1-2 (Higher Eukaryotes and Prokaryotes  
 14 Nucleotide-binding) catalytic domains are indicated. **c.** Experimental setup: HEK293T cells are transfected in  
 15 a 96-well plate, which is placed on a LED-board for blue-light stimulation. At each time point, cells are imaged  
 16 for GFP quantification. **d.** For the SCPTS system, background-subtracted mean GFP intensity is plotted for  
 17 the selected time points (dark or lit), with one of the three promoters (CaSP1/2, Gal4/UAS), with either a non-  
 18 targeting guide (NT) or the CasRx promoter-targeting guide (CasRx). Horizontal bars: mean of all replicates  
 19 (three). **e.** Representative images for the SCPTS CasRx system with the three promoters in presence of the  
 20 CasRx sgRNA. Scale bar: 100  $\mu$ m. Images were taken at 24h post-transfection with a Keyence BZ-X710 with  
 21 4x magnification, in independent experiments from those quantified in panel d.

1 **Figure 2**

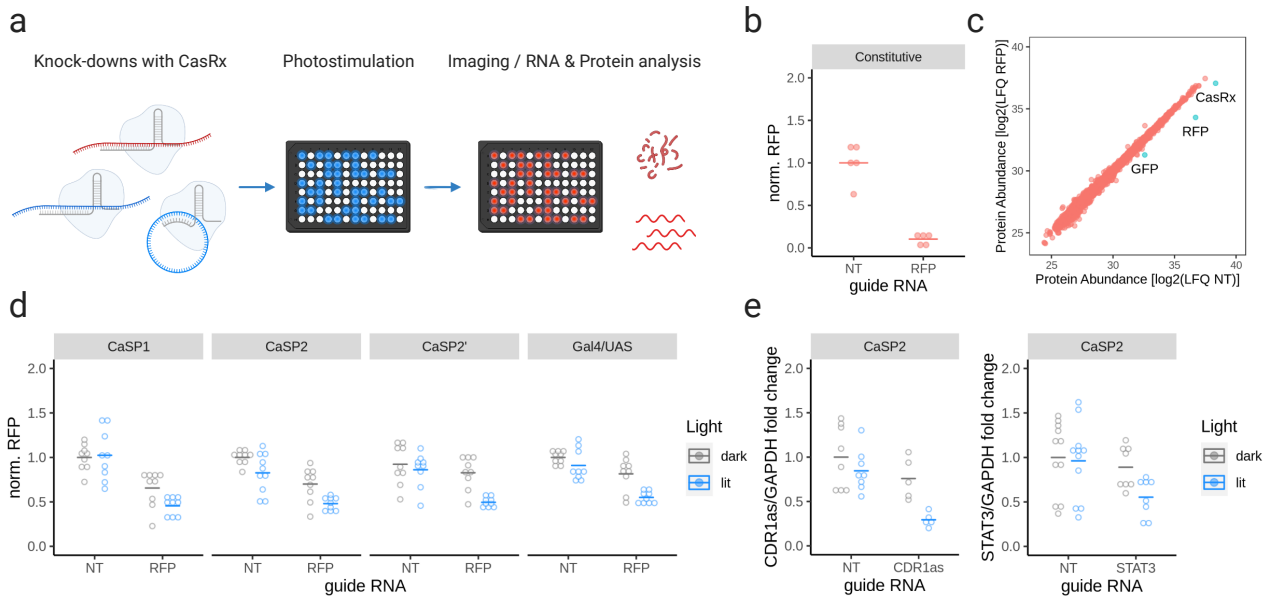

2

3 **Figure 2. Light-inducible knock-down of target RNA.**

4 **a.** CasRx knock-downs of reporter and endogenous target RNAs, along with readouts of efficiency, off-  
 5 targeting and leakage. **b.** Background-subtracted RFP signal intensity normalized on the non-targeting guide  
 6 control (NT), with a constitutively expressed CasRx cotransfected with the RFP reporter, a non-targeting guide  
 7 or an RFP-targeting guide (RFP). Horizontal bars: mean of all replicates (three). **c.** Protein abundance  
 8 (average over 6 replicates: three biological times two technical) in cells transfected with a constitutively  
 9 expressed CasRx, the RFP reporter, a non-targeting guide (NT) or an RFP-targeting guide (RFP). Protein  
 10 abundance was measured by shot-gun proteomics. LFQ: log<sub>2</sub> Label-Free Quantification intensity. Green:  
 11 proteins with statistically significant and > two-fold change. **d.** As in b, for the light-inducible promoters indicated  
 12 on top of each panel used in combination with the SCPTS system. Grey and blue: dark and lit, horizontal bars:  
 13 mean of all replicates (9 for all, 10 for one condition). CaSP1, CaSP2 and CaSP2' (same as CaSP2 but with  
 14 a CasRx devoid of the GFP tag) had a significant difference in fluorescence intensity between dark and lit  
 15 conditions for the RFP-targeting guide (p-value < 0.05, Student's t test). All systems had non-significant  
 16 difference between dark and lit conditions with the non-targeting guide. **e.** qRT-PCR for CDR1as /STAT3,  
 17 normalized to GAPDH and the non-targeting guide control as the reference sample for normalization, for cells  
 18 treated with the CaSP2 CasRx light-inducible system along with either a non-targeting guide (NT) or one  
 19 CDR1as-targeting guide (CDR1as), or a STAT3-targeting guide (STAT3). Grey, blue colors: dark, lit. horizontal  
 20 bars: mean over each condition. p-value < 0.05 in dark vs lit, Student's t test.

21

22

23

24

25

26

27

1 **Figure 3**

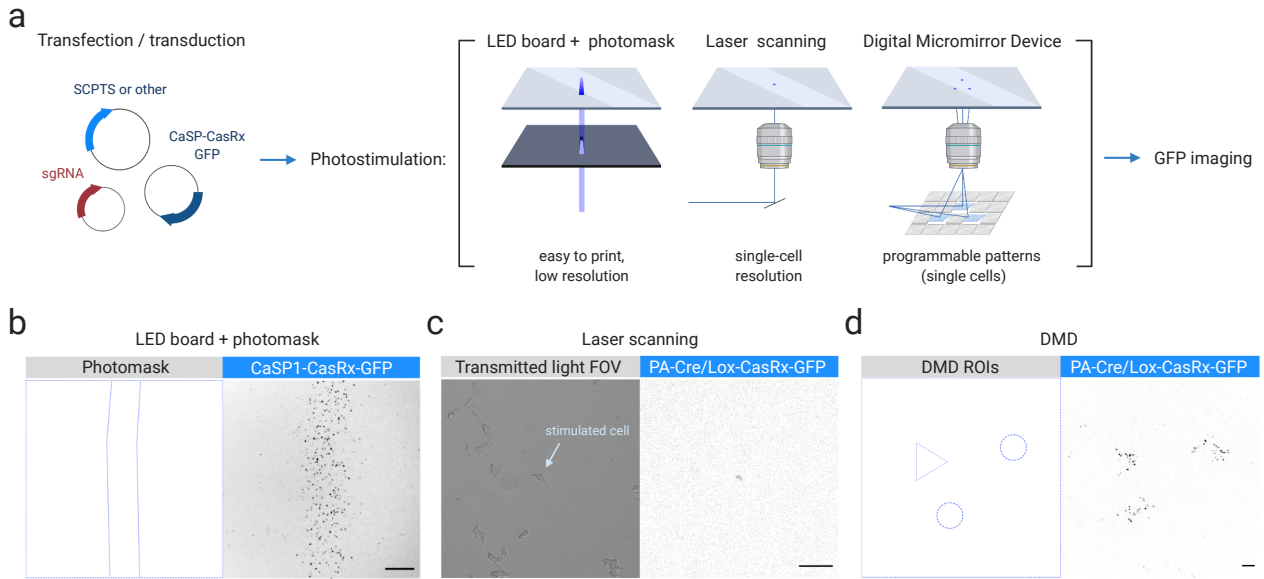

2

3

4 **Figure 3. Spatial patterning of CasRx activation.**

5 **a.** Spatially induced photo-stimulations: cells are stimulated with a blue LED array combined with a black  
6 photomask, or with a confocal microscope setup by laser scanning, or with a Digital Micromirror Device  
7 microscope by a LED source projected through a micromirror array to the cell culture plate bottom. **b.**  
8 Representative fluorescent microscope image of a photomask stimulation of the CaSP1-CasRx system in HEK  
9 cells. Blue: photomask shape. Signal is GFP in grey scale. Scale bar: 500  $\mu\text{m}$ . **c.** Representative image of a  
10 single-cell Cre/Lox CasRx stimulation in HEK cells, performed with 100 Hz laser scanning within a confocal  
11 microscope setup. Left: transmitted light image, right: confocal image of the GFP signal in grey scale. Scale  
12 bar: 100  $\mu\text{m}$ . **d.** Representative image of a complex pattern stimulation of the Cre/Lox CasRx system in hiPSCs  
13 performed with the DMD setup. The selected ROIs are shown on the left, while the NeonGreen signal imaged  
14 with a confocal setup after 24h stimulation within the DMD setup is shown in grey scale on the right. Scale bar:  
15 100  $\mu\text{m}$ .

16

1 **Figure 4**

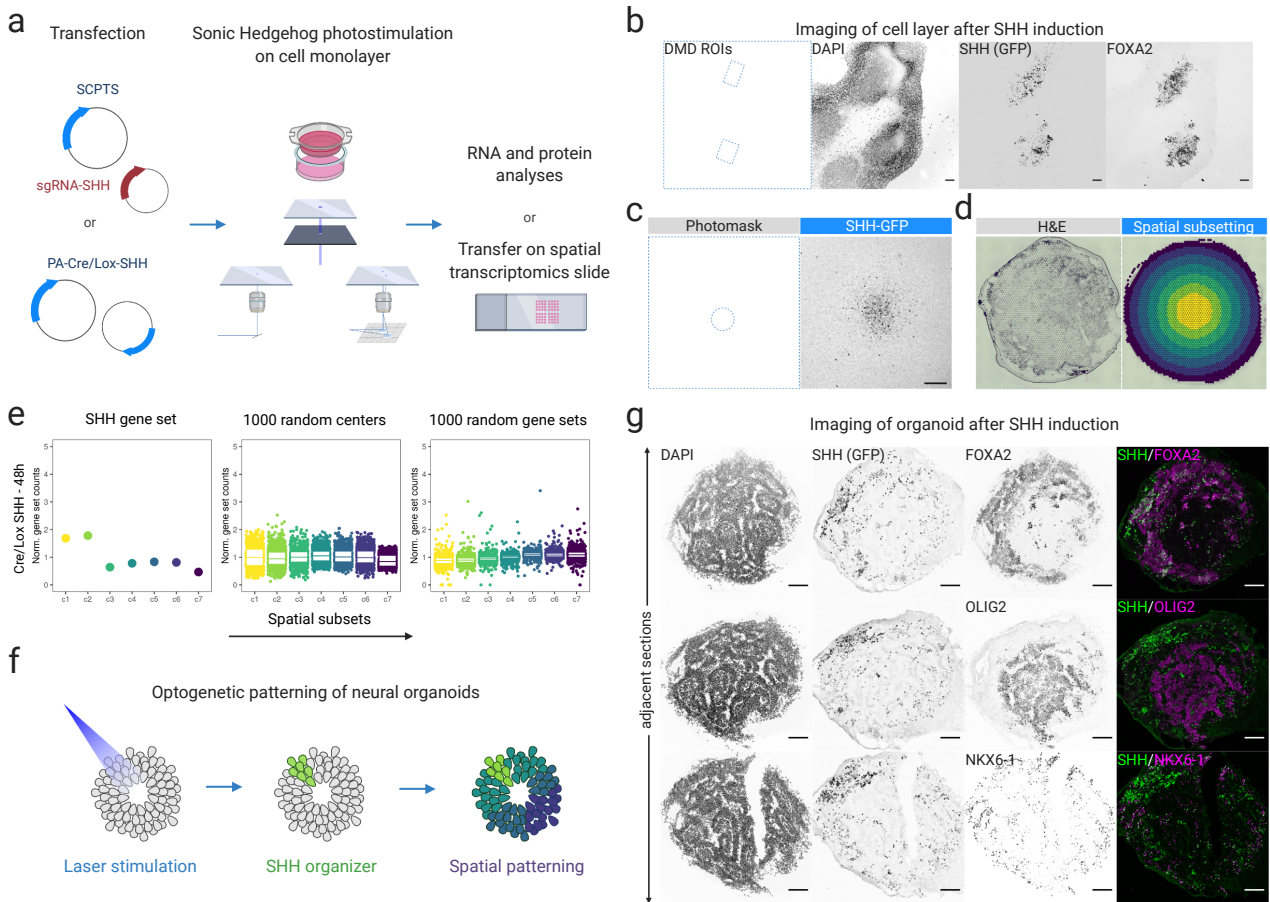

2

3 **Figure 4. Optogenetic stimulation of Sonic Hedgehog in human stem cells and organoids.**

4 **a.** Coupled optogenetic stimulation of SHH and spatial readouts. **b.** Imaging of DAPI, SHH-expressing cells  
5 marked by NeonGreen (labeled as GFP for simplicity) and FOXA2 (immunofluorescence) in hiPSCs. SHH  
6 was in the two ROIs on the left with the DMD setup and then cultured in neural induction media for 6 days.  
7 Signal is shown in greyscale for each channel. Scale bar: 100  $\mu$ m. **c.** Representative image of hiPSCs  
8 *SHH* cultured as a monolayer on a PET membrane, induced in the center with a 500  $\mu$ m-wide circular  
9 photomask (left). Signal is shown in greyscale (right). Scale bar: 500  $\mu$ m. **d.** Left: representative H&E staining  
10 of a hiPSC layer cultured on a membrane and transferred onto a VISIUM slide. Right: representative spatial  
11 subsetting of spots within a capture area of a VISIUM slide into 7 concentric circles, centered on the SHH-  
12 induced area. **e.** Left: normalized counts of a *SHH* gene set (*SHH*, *FOXA2*, *FOXG1*, *NKX2-1*, *NKX2-2*, *NKX6-  
13 2*, *NKX6-1*, *OLIG2*) in the 7 concentric circles c1-7, color coded as in d, in hiPSCs stimulated for 48h. Middle:  
14 same as left, sampling 1000 times a random central spot. Right: same as left, sampling 1000 times a random  
15 gene set. C1-2 were significant over both spatial and gene set sampling (p-value < 0.05). **f.** Optogenetic  
16 patterning of neural organoids: an embryoid body expressing the PA-Cre/Lox-SHH-GFP system is  
17 photostimulated in a restricted area via laser scanning. The resulting organizer, made of SHH-expressing cells,  
18 instructs the neighboring cells to form distinct spatial domains of gene expression. **g.** Imaging of DAPI, SHH-  
19 expressing cells marked by NeonGreen (GFP for simplicity) and FOXA2/OLIG2/NKX6-1 in adjacent cryo-  
20 sections of neural organoids with laser induction of SHH in the north-west pole. Signal in grey scale for each  
21 target separately, and merged in green and magenta (right). Scale bar: 100  $\mu$ m. Experiment was performed in  
22 4 replicates and representative images are shown here.
